# Supplementary material for: Exploring the physicochemical role of Pd dopant in promoting Li-ion diffusion dynamics and storage performance of NbS2 at the atomic scale
Source: Royal Society of Chemistry journal article supplement (doi:10.1039/d2cp01340a), 2022-01-01
Supplement: d2cp01340a1.pdf [file d2cp01340a1.pdf]

## Supporting information

### **Exploring the physicochemical role of Pd dopant in promoting Li-ion diffusion dynamics and storage performance for NbS<sub>2</sub> at atomic scale**

Piaopiao Wen<sup>a</sup>, Huangkai Wang<sup>a</sup>, Xianyou Wang<sup>b</sup>, Haibo Wang<sup>c,\*</sup>, Yansong Bai<sup>b,\*</sup>,  
Zhenhua Yang<sup>a,\*</sup>

*<sup>a</sup>Key Laboratory of Low Dimensional Materials & Application Technology of Ministry of Education, School of Materials Science and Engineering, Xiangtan University, Xiangtan 411105, Hunan, China*

*<sup>b</sup>National Base for International Science & Technology Cooperation, National-Local Joint Engineering Laboratory for Key Materials of New Energy Storage Battery, Hunan Province Key Laboratory of Electrochemical Energy Storage and Conversion, School of Chemistry, Xiangtan University, Xiangtan 411105, Hunan, China.*

*<sup>c</sup>NanChang JiaoTong Institute, Nanchang 330100, Jiangxi, China*

---

\*Corresponding authors. Address: *Key Laboratory of Low Dimensional Materials & Application Technology of Ministry of Education, School of Materials Science and Engineering, Xiangtan University, Xiangtan 411105, Hunan, China.*

E-mail address: yangzhenhua@xtu.edu.cn (Zhenhua Yang)

whbcu@ncjti.edu.cn (Haibo Wang)

baiyansong2007@126.com (Yansong Bai)

## 1. Structural properties

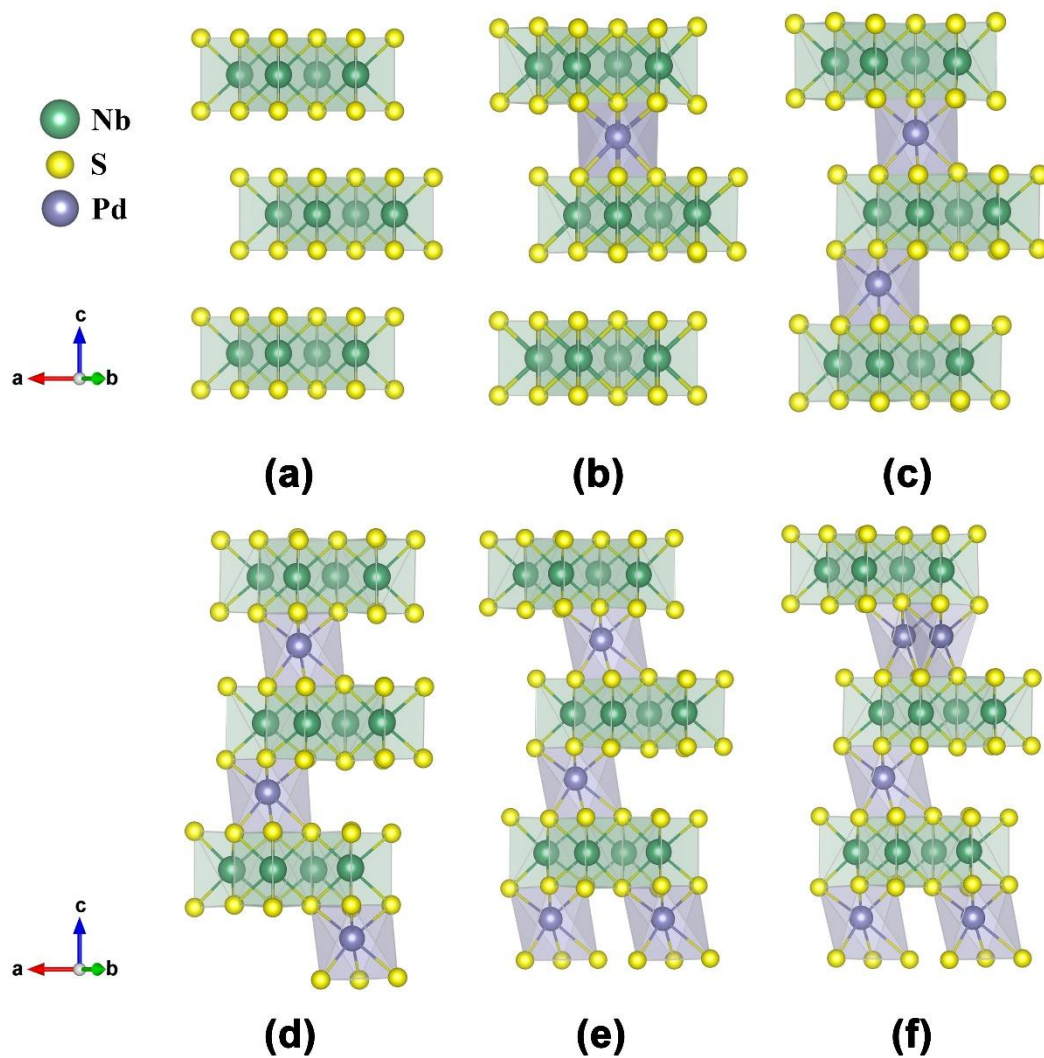

**Fig. S1** The crystal structures of (a) NbS<sub>2</sub>, (b) Pd<sub>0.083</sub>NbS<sub>2</sub>, (c) Pd<sub>0.167</sub>NbS<sub>2</sub>, (d) Pd<sub>0.25</sub>NbS<sub>2</sub>, (e) Pd<sub>0.333</sub>NbS<sub>2</sub>, and (f) Pd<sub>0.417</sub>NbS<sub>2</sub>.

## 2. Screening the structure of $\text{Pd}_x\text{NbS}_2$ ( $x = 0, 0.083, 0.167, 0.250, 0.333, 0.417$ )

Three kinds of Pd intercalation sites were considered: an octahedral site (directly above the Nb atom) and two tetrahedral sites (one where Pd is directly above the S atom, and the other where Pd is directly below the S atom). (see Fig. S2). Based on the first-principle calculation, the Pd atom is favorable to occupy the octahedral interstice. The Pd-S bond lengths vary from 2.42 Å to 2.53 Å, which is close to the range of ionic and covalent bonds of Pd-S (see Fig. S2(a)). Weak orbital hybridization between Pd-4d orbitals and surrounding S-3p orbitals is observed, indicating that there is a weak covalent interaction between Pd and S.

Furthermore, in order to determine which kind of doping for Pd it is in the crystal structure of  $\text{NbS}_2$  (embedded type or substitution type), the formation energy of  $\text{Pd}_x\text{NbS}_2$  and  $\text{Pd}_x\text{Nb}_{(1-x)}\text{S}_2$  (*i.e.*,  $\text{NbPd}_3$ ,  $\text{Pd}_4\text{S}$ ,  $\text{Pd}_3\text{S}$ ,  $\text{PdS}_2$ ,  $\text{PdS}$ ,  $\text{Pd}_{16}\text{S}_7$ ,  $\text{Nb}_2\text{PdS}_5$ , and  $\text{Nb}_2\text{PdS}_6$ ) were also calculated. Fig. S8 and S9 show the formation energy of  $\text{Pd}_x\text{NbS}_2$  and  $\text{Pd}_x\text{Nb}_{(1-x)}\text{S}_2$  under the growth condition of A-B. It can be easily found that no matter what kind of doping system it is for Pd element, the formation energy of the embedded type is lower than that of the substituted type. So, the Pd doping in the phase of  $\text{NbS}_2$  compound is preferentially embedded in the van der Waals interstice.

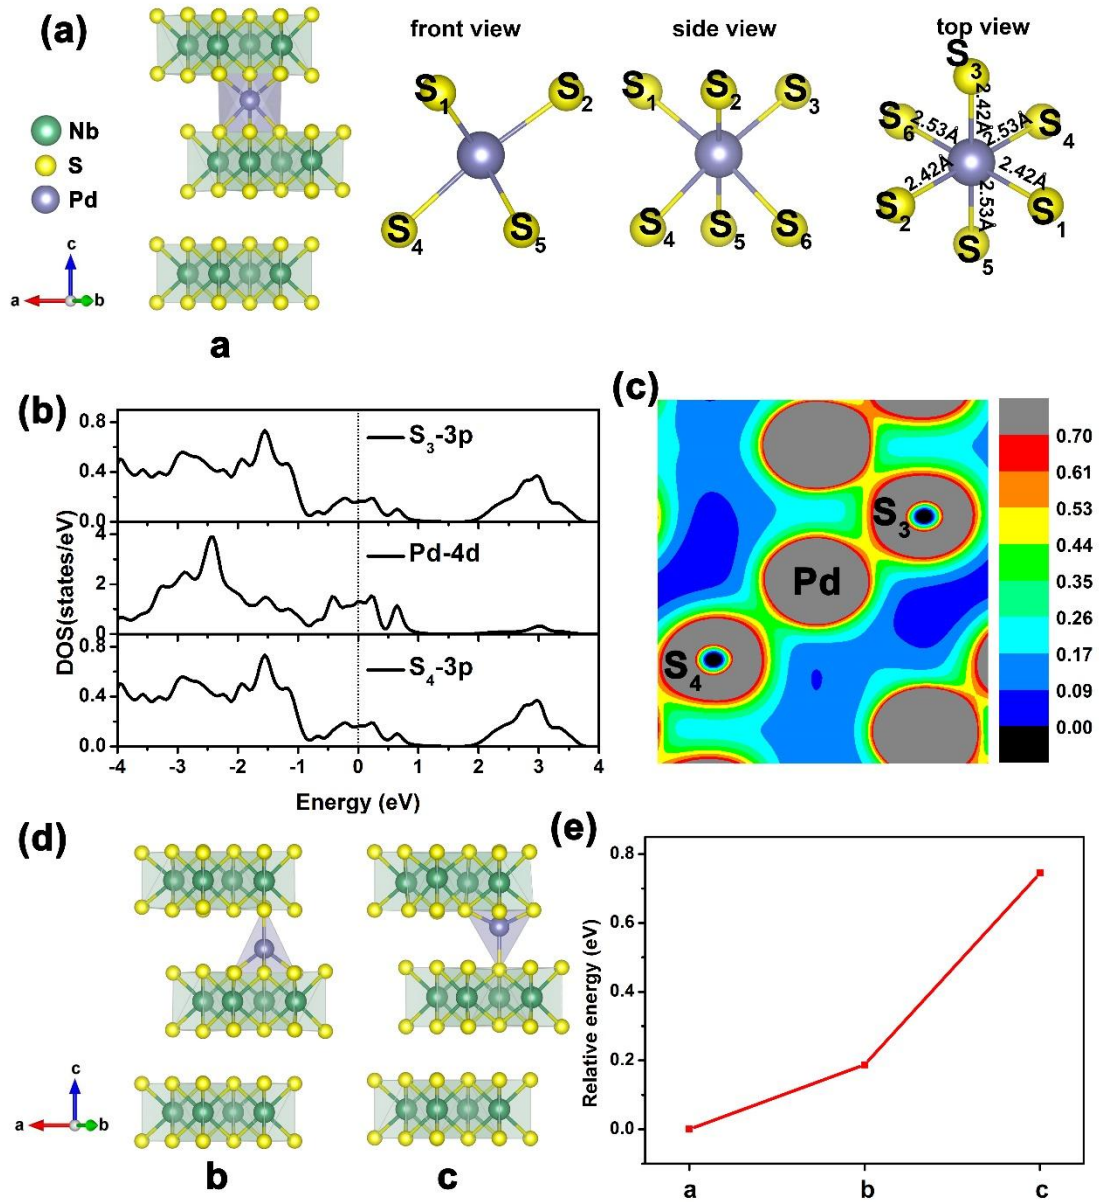

**Fig. S2** Three different Pd doping sites. (a) octahedral site, (d) two different tetrahedral sites. (b) The density of states (DOS) and (c) charge density of  $S_3$ -Pd- $S_4$  clusters when Pd occupies the octahedral site. (e) the relative energies as a function of Pd doping sites.

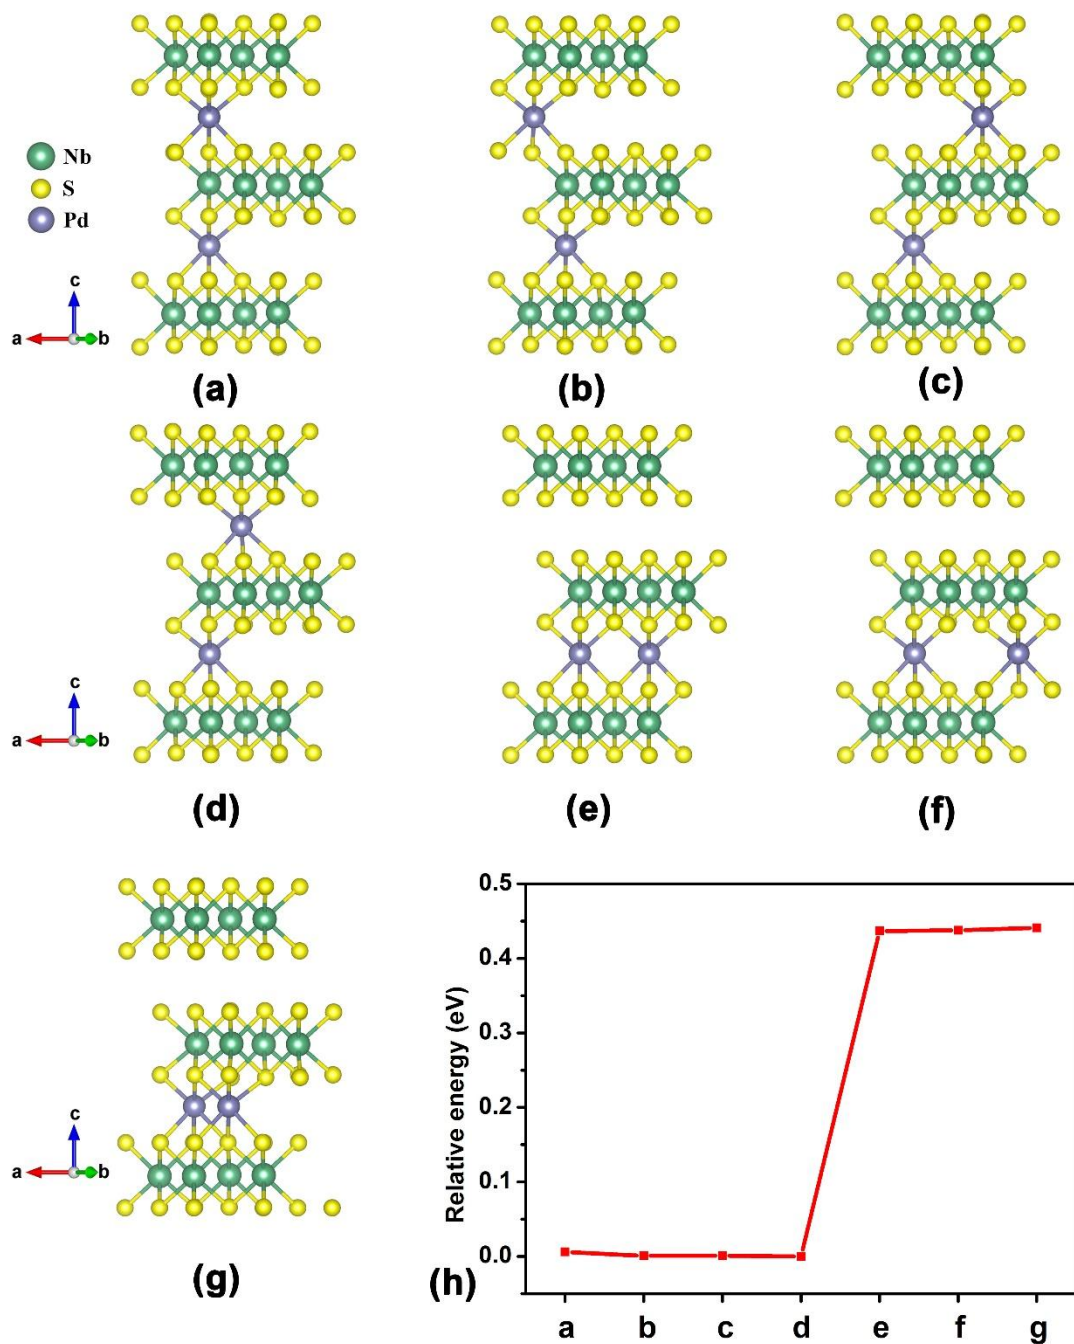

**Fig. S3** Seven kinds of structures of  $\text{Pd}_{0.167}\text{NbS}_2$  and (h) their corresponding relative energies. Different Pd-doped structures are labeled as (a), (b), (c), (d), (e) and (g).

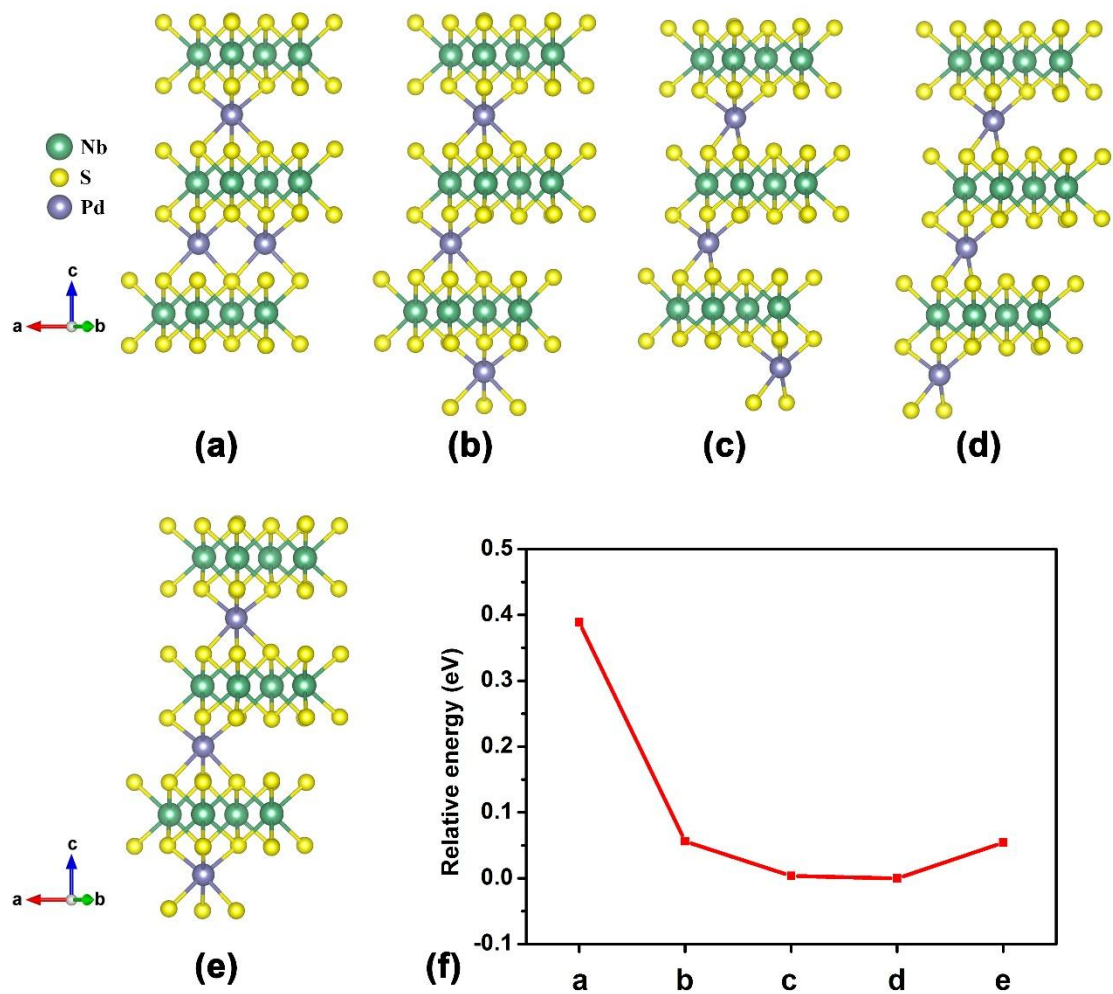

**Fig. S4** Five kinds of structures of  $\text{Pd}_{0.250}\text{NbS}_2$  and (f) their corresponding relative energies. Different Pd-doped structures are labeled as (a), (b), (c), (d) and (e).

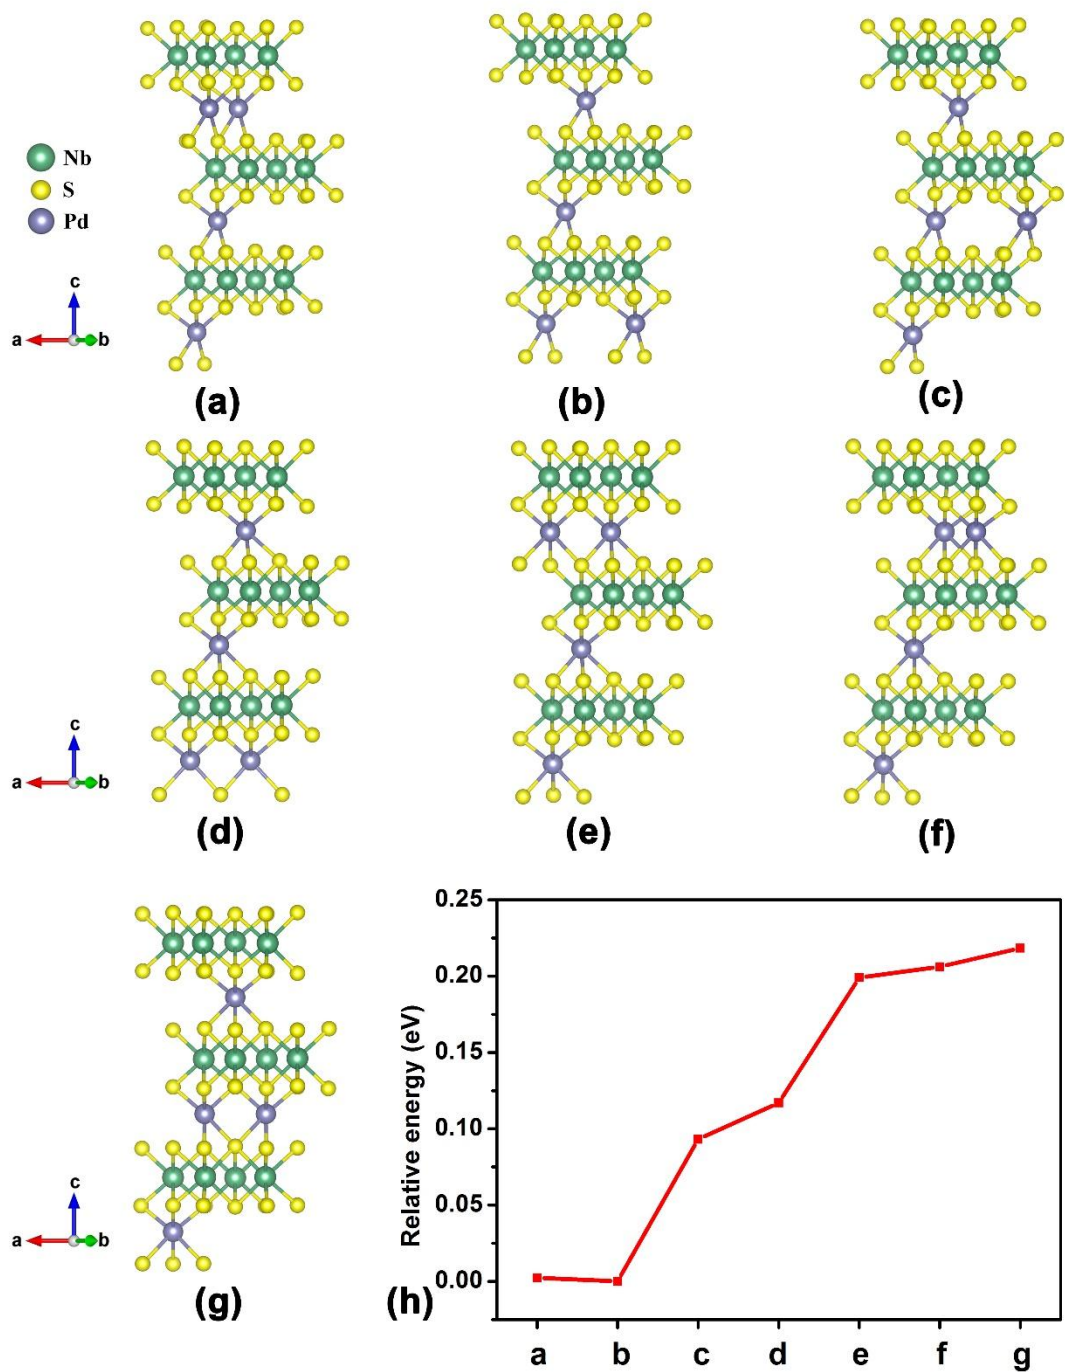

**Fig. S5** Seven kinds of structures of  $\text{Pd}_{0.333}\text{NbS}_2$  and (h) their corresponding relative energies. Different Pd-doped structures are labeled as (a), (b), (c), (d), (e) and (g).

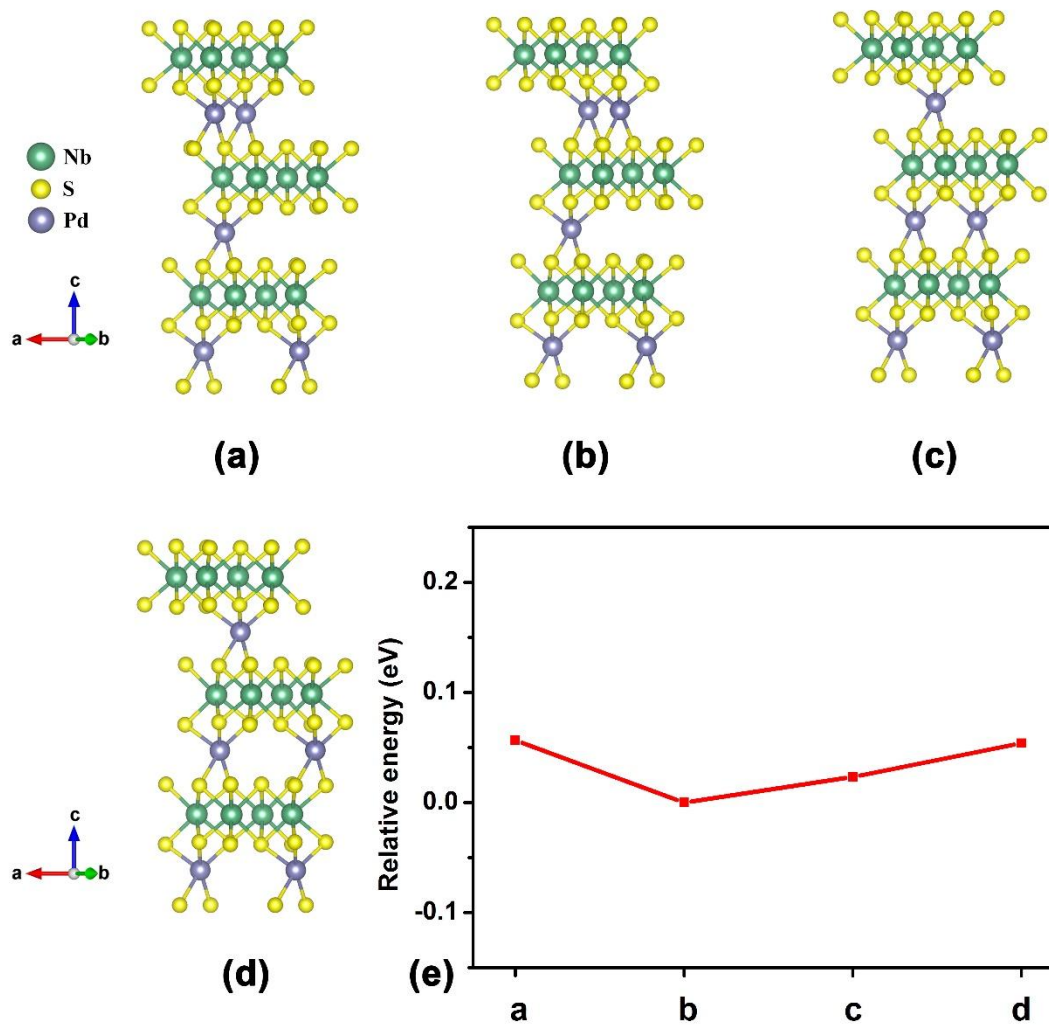

**Fig. S6** Four kinds of structures of Pd<sub>0.417</sub>NbS<sub>2</sub> and (e) their corresponding relative energies. Different Pd-doped structures are labeled as (a), (b), (c), and (d).



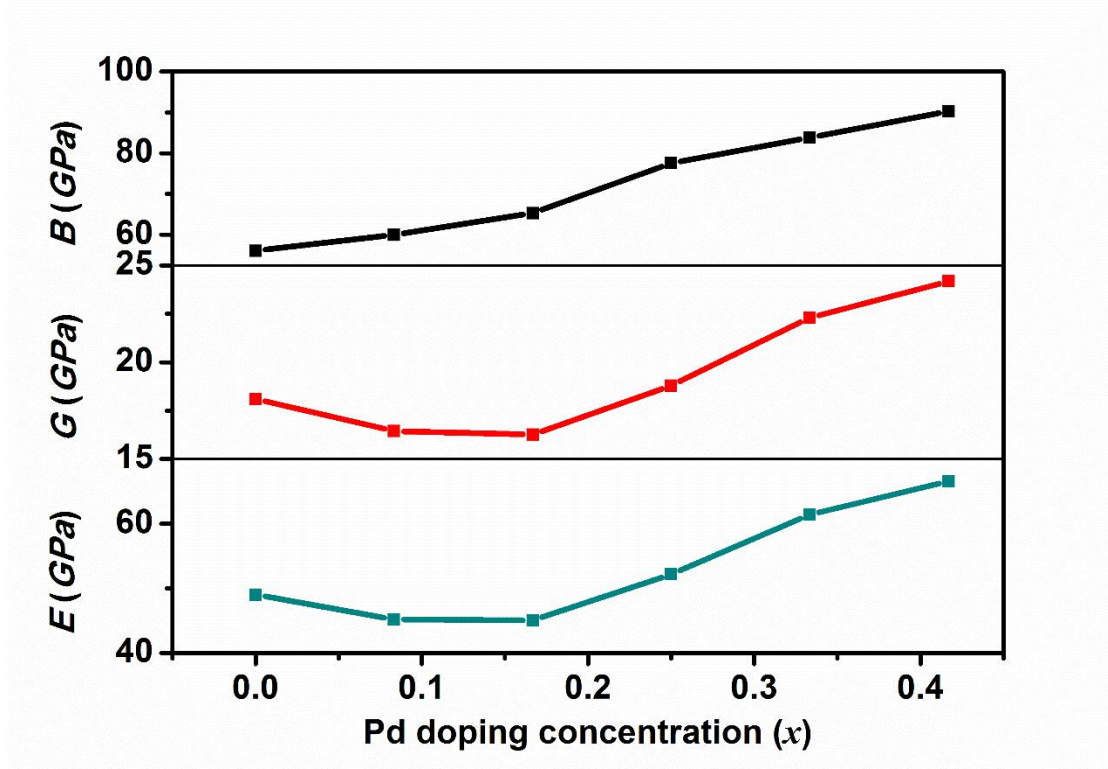

**Fig. S7** The variation of  $B$ ,  $G$  and  $E$  as a function of Pd-doped concentration ( $x$ ) for  $\text{Pd}_x\text{NbS}_2$  ( $x = 0, 0.083, 0.167, 0.250, 0.333, 0.417$ ).

To evaluate the stability of the heteroatom-doped structure, the impurity formation energy of  $\text{Pd}_{1-x}\text{NbS}_2$  is calculated as the following formula:<sup>1</sup>

$$E_{form} = E_{tot}(\text{Pd}_x\text{Nb}_{1-x}\text{S}_2) - E_{tot}(\text{NbS}_2) - \sum n_i(\Delta\mu_i + \mu_i) \quad (1)$$

Where the  $E_{tot}(\text{Pd}_x\text{Nb}_{1-x}\text{S}_2)$  represents the total energy of the  $\text{Pd}_x\text{Nb}_{1-x}\text{S}_2$ , and the  $E_{tot}(\text{NbS}_2)$  is the total energy of the perfect crystal cell.  $n_i$  is the number of atoms (add:  $n_i < 0$ , remove:  $n_i > 0$ ).  $\mu_i$  is the chemical potential of the host atoms or the impurity atoms.  $\Delta\mu_i$  is the relative chemical potential of element  $i$  under different chemical growth environments.  $\mu_{\text{Nb}}$ ,  $\mu_{\text{S}}$  and  $\mu_{\text{Pd}}$  refer to the total energies of Nb, S, and Pd elemental solids, respectively.

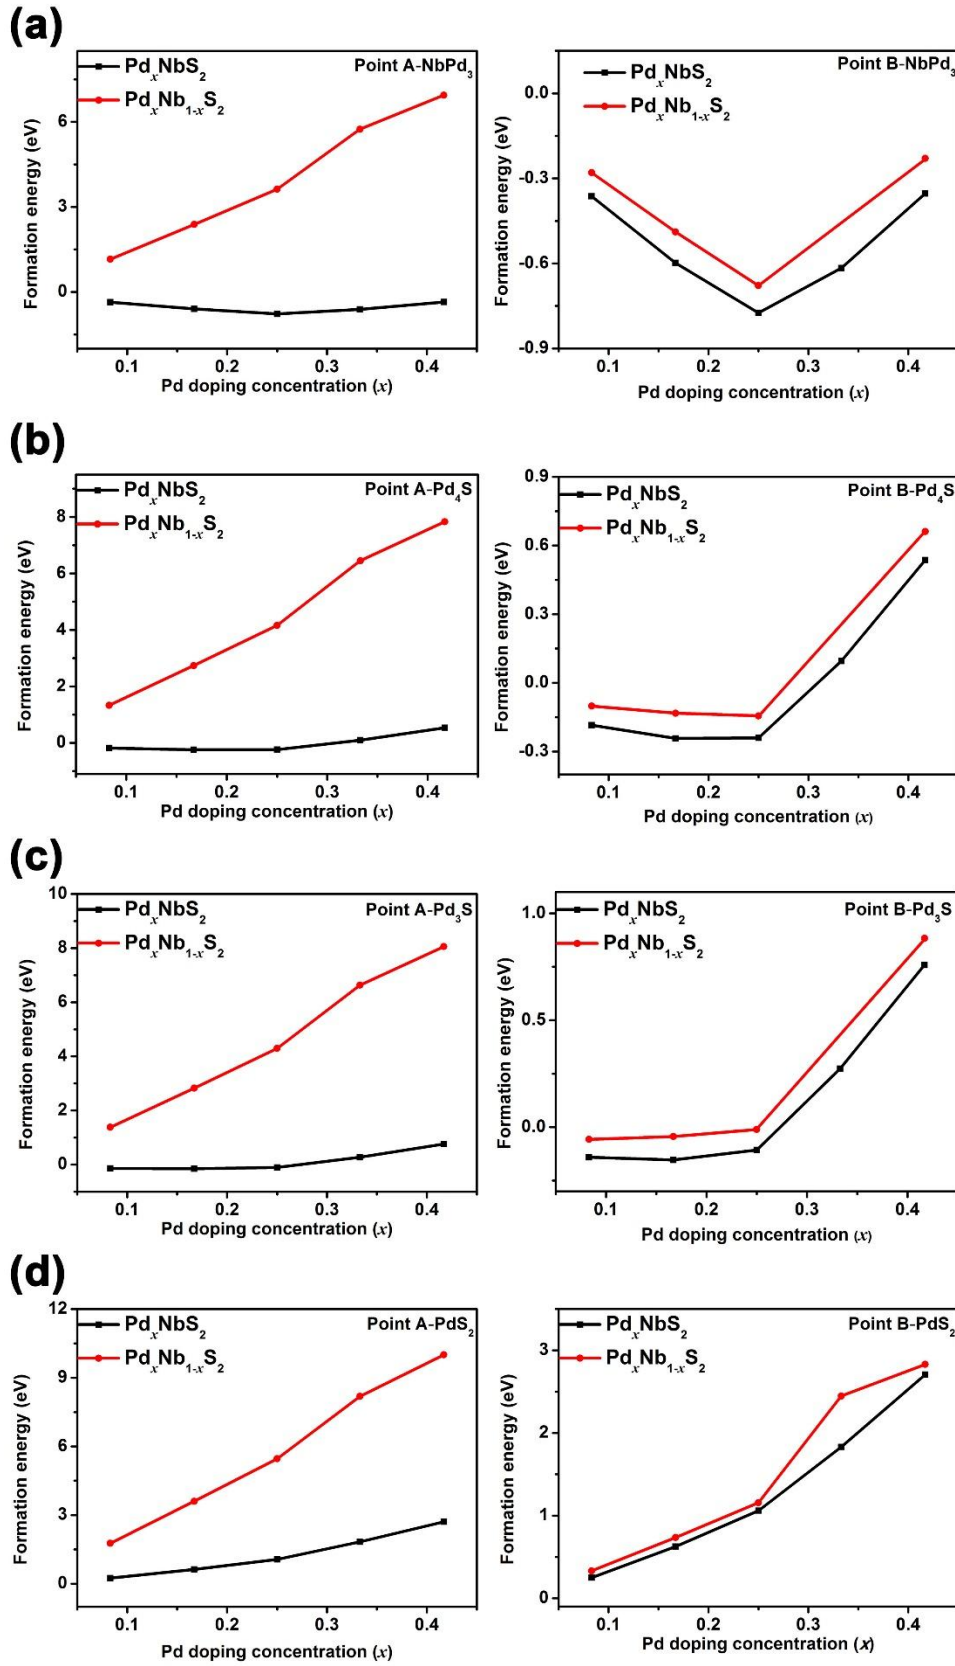

**Fig. S8** The formation energies of (a) NbPd<sub>3</sub>, (b) Pd<sub>4</sub>S, (c) Pd<sub>3</sub>S and (d) PdS<sub>2</sub> doping at the points A and B in the chemical potential region.

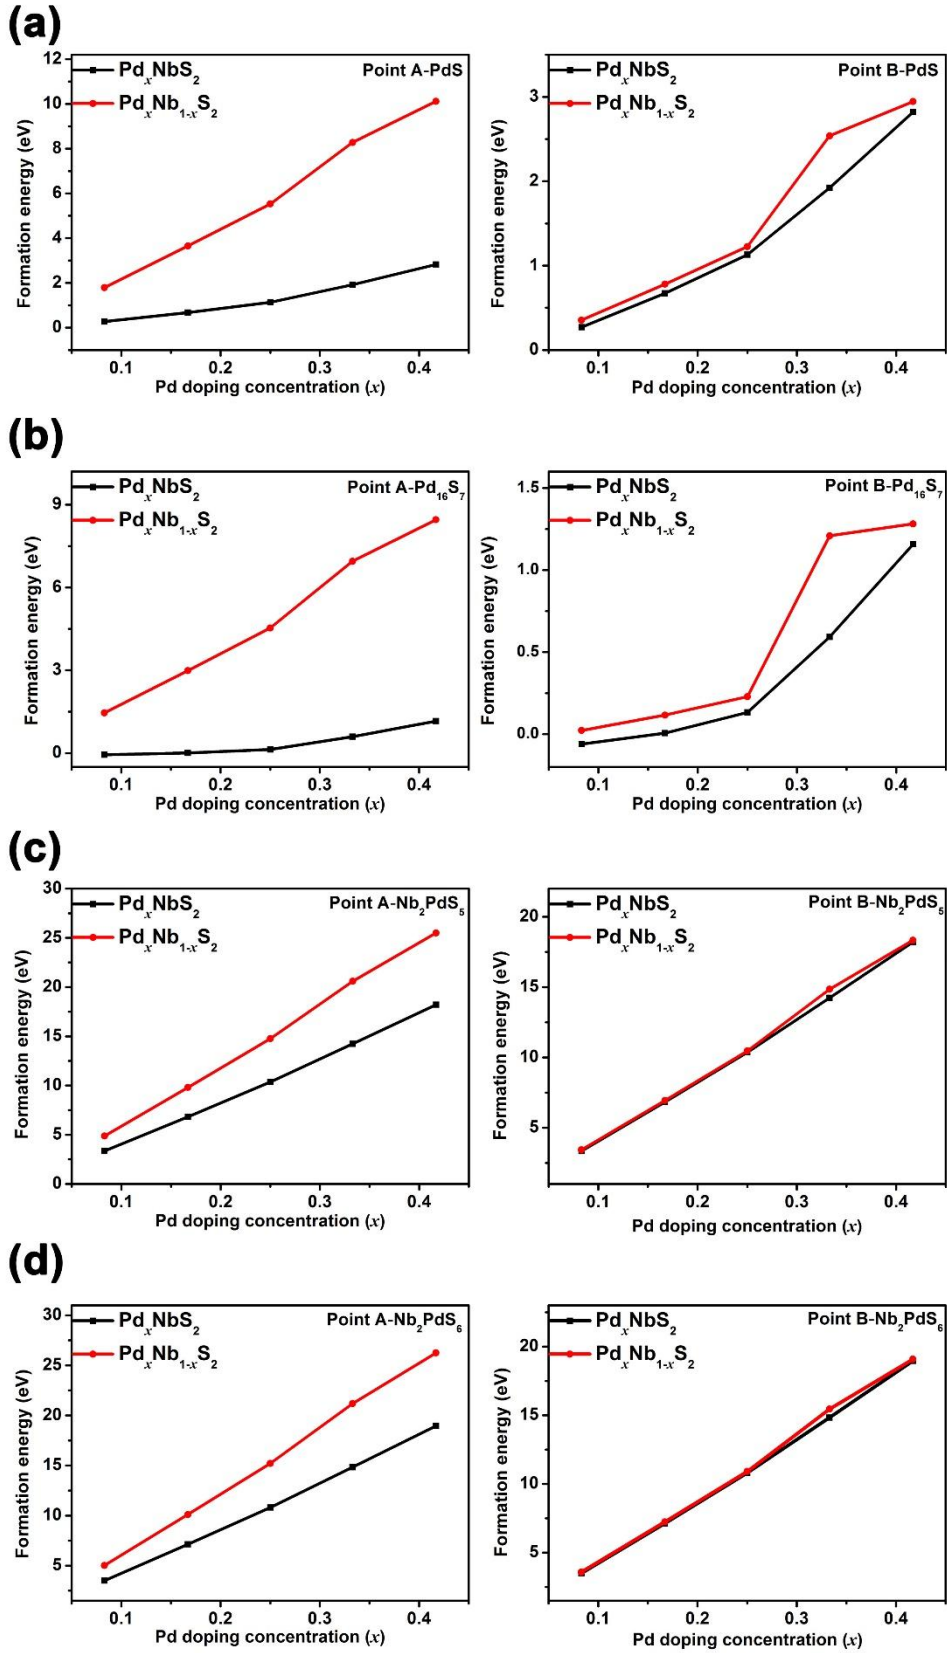

**Fig. S9** The formation energies of (a) PdS, (b) Pd<sub>16</sub>S<sub>7</sub>, (c) Nb<sub>2</sub>PdS<sub>5</sub>, and (d) Nb<sub>2</sub>PdS<sub>6</sub>

doping at the points A and B in the chemical potential region.

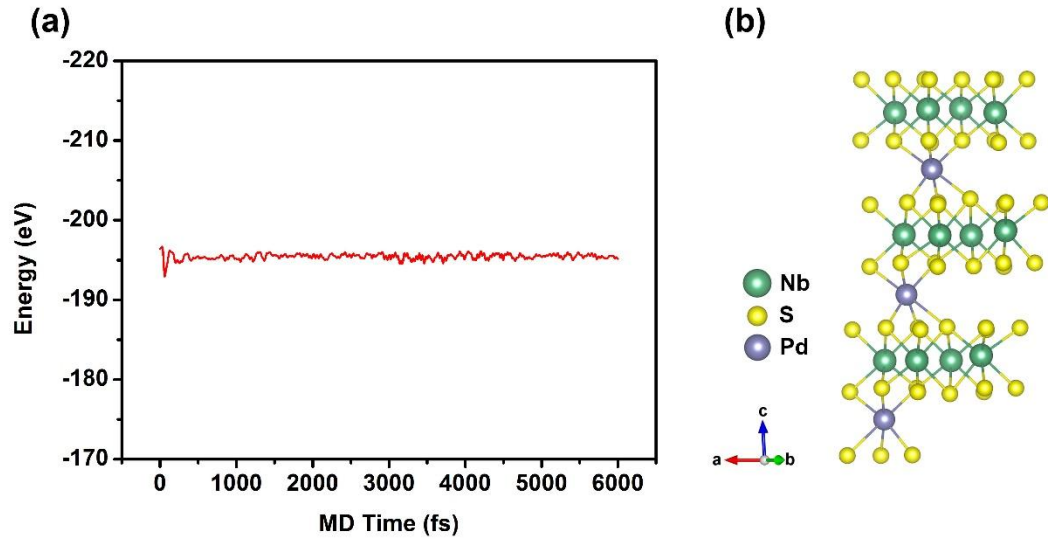

**Fig. S10** (a) The total energies of Pd<sub>0.25</sub>NbS<sub>2</sub> as a function of AIMD time. (b) The optimized structure of Pd<sub>0.25</sub>NbS<sub>2</sub> at 300K after 6000 fs.

### 3. Electronic structure of Pd<sub>x</sub>NbS<sub>2</sub> ( $x = 0, 0.083, 0.167, 0.250, 0.333, 0.417$ )

In order to consider the spin polarization of Pd metal, we have calculated the density of state (DOS) of Pd<sub>x</sub>NbS<sub>2</sub> (0.083, 0.167, 0.250, 0.333, 0.417). It is noted that the spin-up and spin-down bands of Pd-4d and total DOS both show symmetric character (see Fig. S11). Therefore, Pd element in Pd<sub>x</sub>NbS<sub>2</sub> (0.083, 0.167, 0.250, 0.333, 0.417) exhibits the character of non-spin polarization.

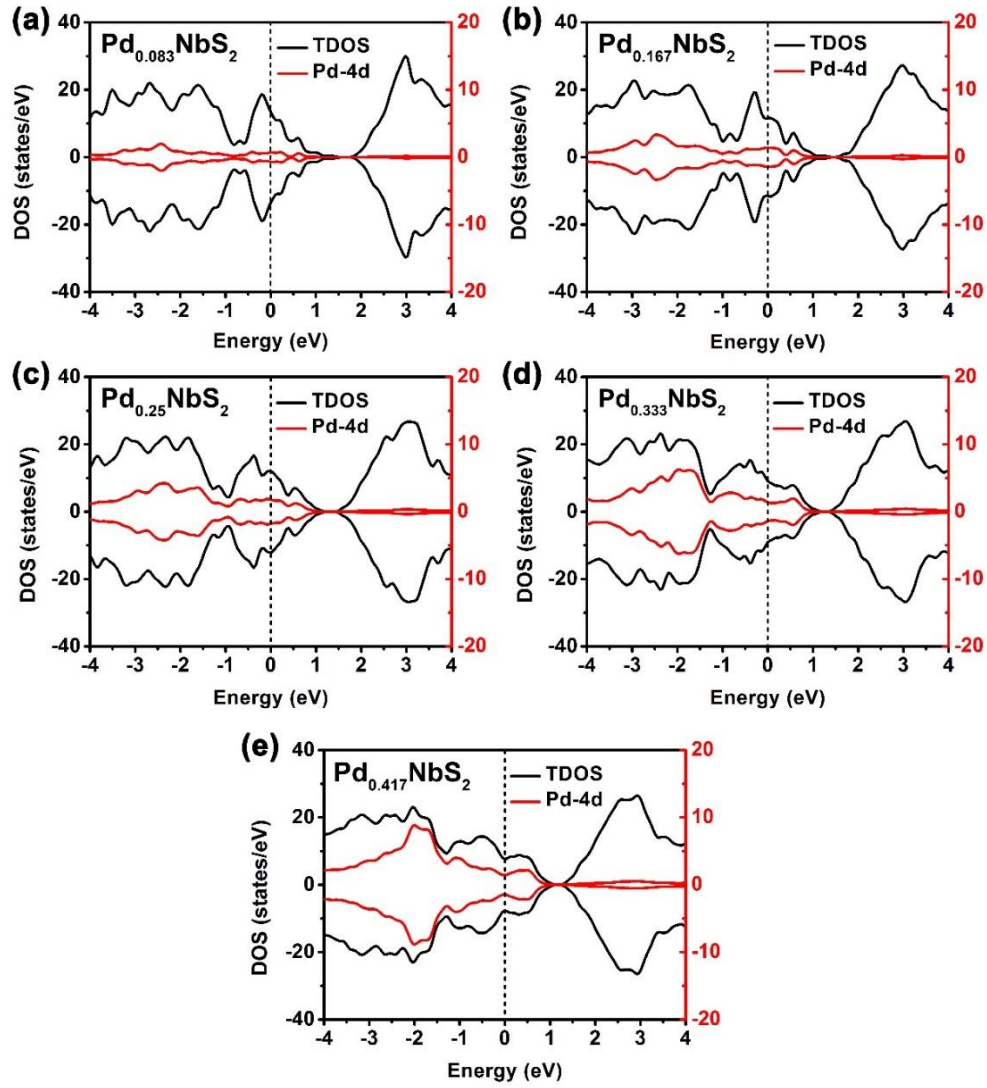

**Fig. S11** The total DOS and partial DOS of Pd. (a)  $\text{Pd}_{0.083}\text{NbS}_2$ ; (b)  $\text{Pd}_{0.167}\text{NbS}_2$ ; (c)  $\text{Pd}_{0.250}\text{NbS}_2$ ; (d)  $\text{Pd}_{0.333}\text{NbS}_2$ ; (e)  $\text{Pd}_{0.417}\text{NbS}_2$ . The Fermi level is indicated by the dashed line.

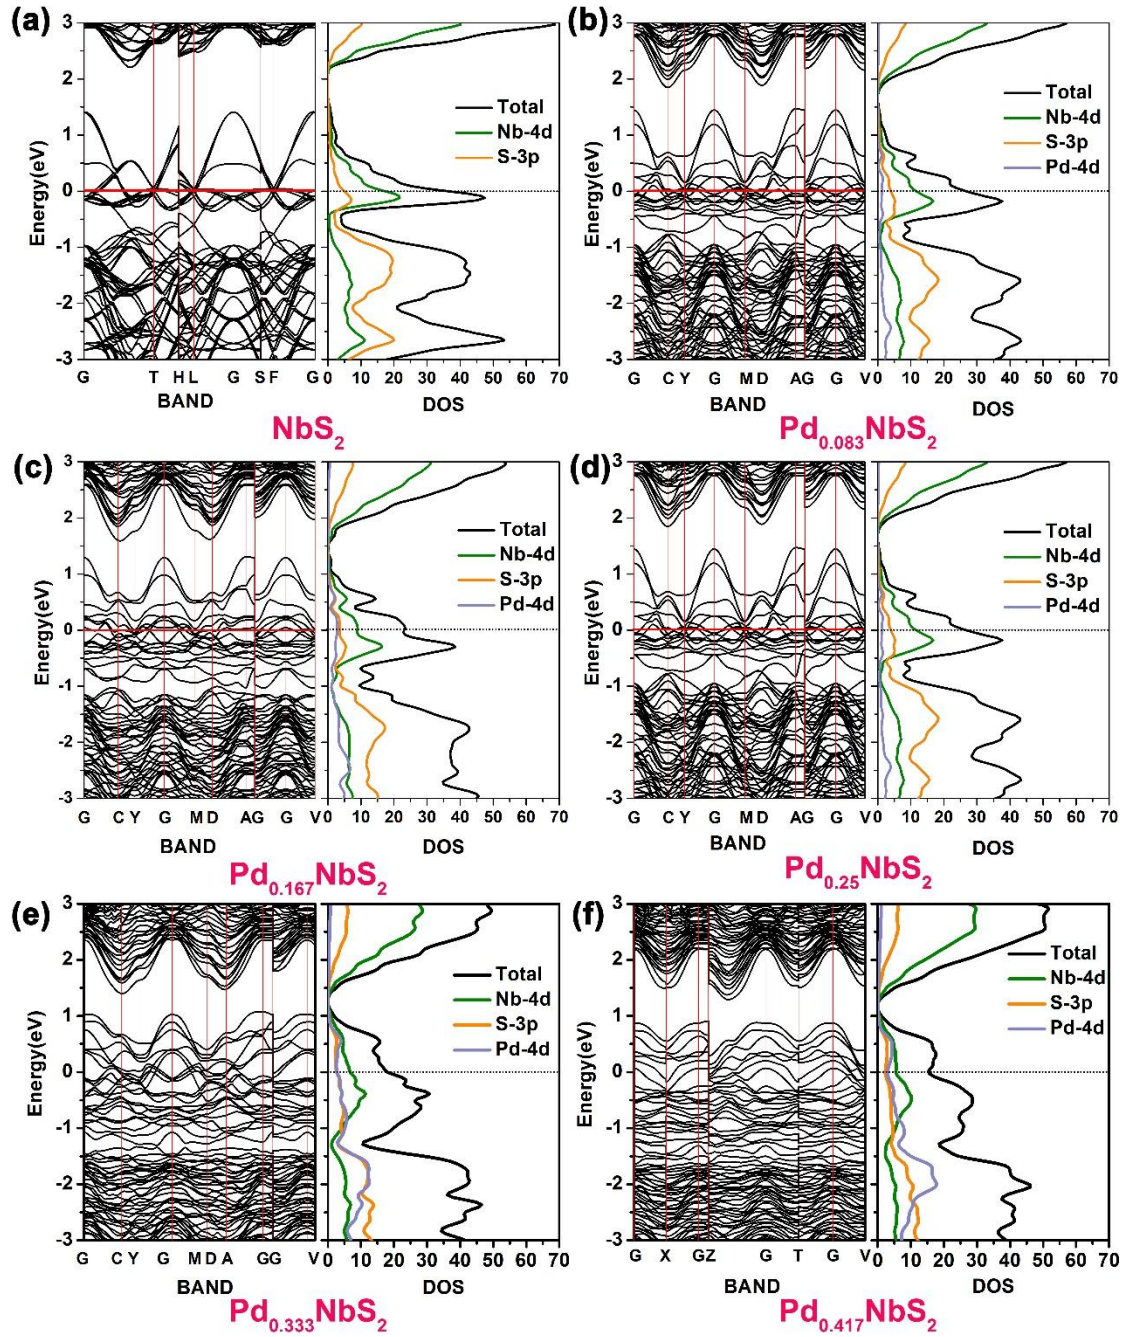

**Fig. S12** Band structure and the density of states of (a)  $\text{NbS}_2$ , (b)  $\text{Pd}_{0.083}\text{NbS}_2$ , (c)  $\text{Pd}_{0.167}\text{NbS}_2$ , (d)  $\text{Pd}_{0.25}\text{NbS}_2$ , (e)  $\text{Pd}_{0.333}\text{NbS}_2$ , and (f)  $\text{Pd}_{0.417}\text{NbS}_2$ .

#### 4. The Li insertion mechanism occurring in the Pd<sub>x</sub>NbS<sub>2</sub> (x = 0, 0.083, 0.167, 0.250, 0.333, 0.417)

We introduced binding energy ( $E_{\text{bind}}$ ) to evaluate the stability of the configuration of the embedded Li atoms and the binding energy can be defined as follows:<sup>2, 3</sup>

$$E_{\text{bind}} = E_{\text{Li/Pd}_x\text{NbS}_2} - E_{\text{Pd}_x\text{NbS}_2} - E_{\text{Li}} \quad (1)$$

where  $E_{\text{Li/Pd}_x\text{NbS}_2}$  and  $E_{\text{Pd}_x\text{NbS}_2}$  are the total energy of Li/Pd<sub>x</sub>NbS<sub>2</sub> and Pd<sub>x</sub>NbS<sub>2</sub>, respectively.  $E_{\text{Li}}$  is the energy per Li atom in the perfect crystal of Li. Firstly, we calculated the binding energy of Li atom in the Pd<sub>0.083</sub>NbS<sub>2</sub> structure, as shown in Fig. S13. The binding energy of Li atom occupying the octahedral interstice position of site-1 is -2.50 eV. It is lower than that of the octahedral interstice position of two tetrahedrons (site-2 and site-3) and the octahedral interstice positions of site-4 which is located in the same layer doped by Pd. These results indicate that the Li atoms prefer to occupy the octahedral interstitial position of the Pd-free layer. Similarly, the binding energies of Li atoms in Pd<sub>x</sub>NbS<sub>2</sub> structures at other concentrations were also calculated (for details, see Fig. S14-S17). The lowest binding energies of Pd<sub>0.167</sub>NbS<sub>2</sub>, Pd<sub>0.25</sub>NbS<sub>2</sub>, Pd<sub>0.333</sub>NbS<sub>2</sub> and Pd<sub>0.417</sub>NbS<sub>2</sub> are -2.53 eV, -2.21 eV, -2.16 eV and -2.12 eV, respectively.

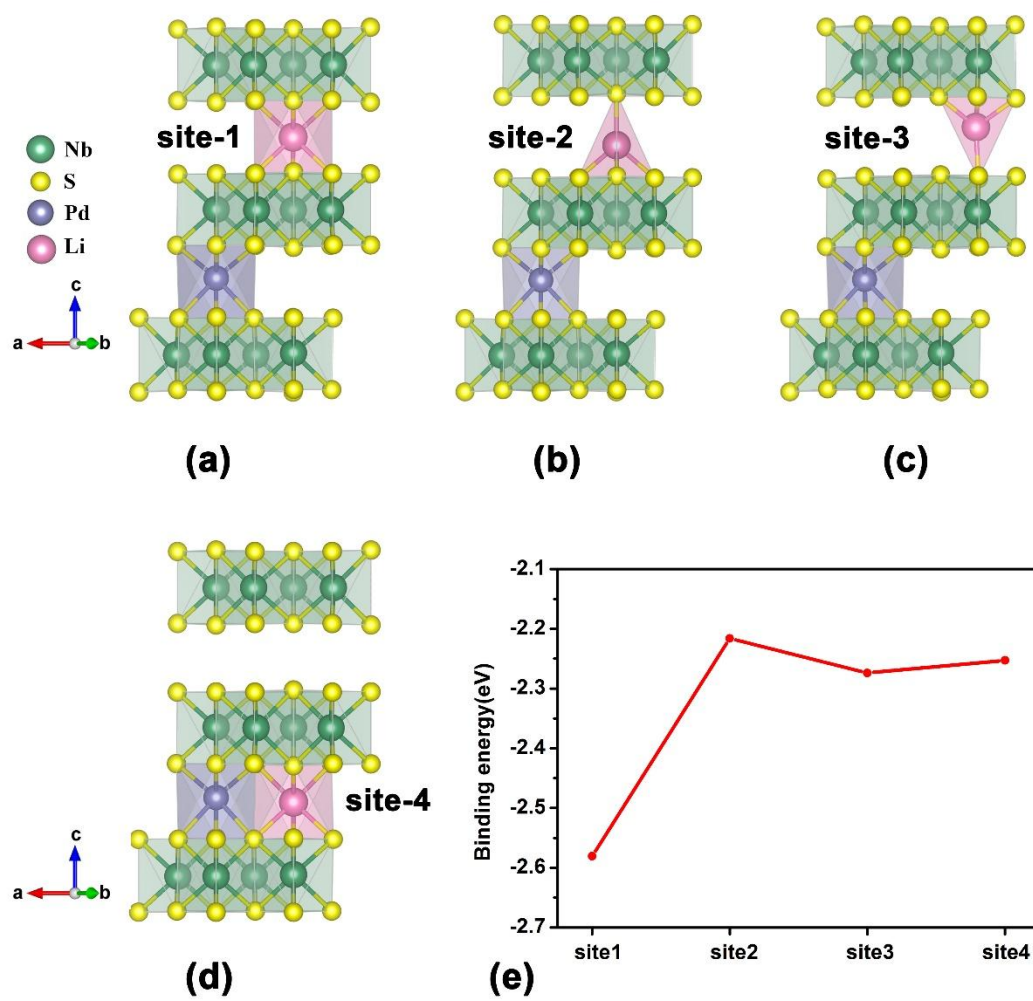

**Fig. S13** Schematic diagrams of the Li intercalation positions for the two kinds of octahedral interstice position ((a),(d)) and two kinds of tetrahedral interstice position((b),(c)). (e) The binding energies as a function of positions of Li ions in the  $\text{Pd}_{0.083}\text{NbS}_2$ .



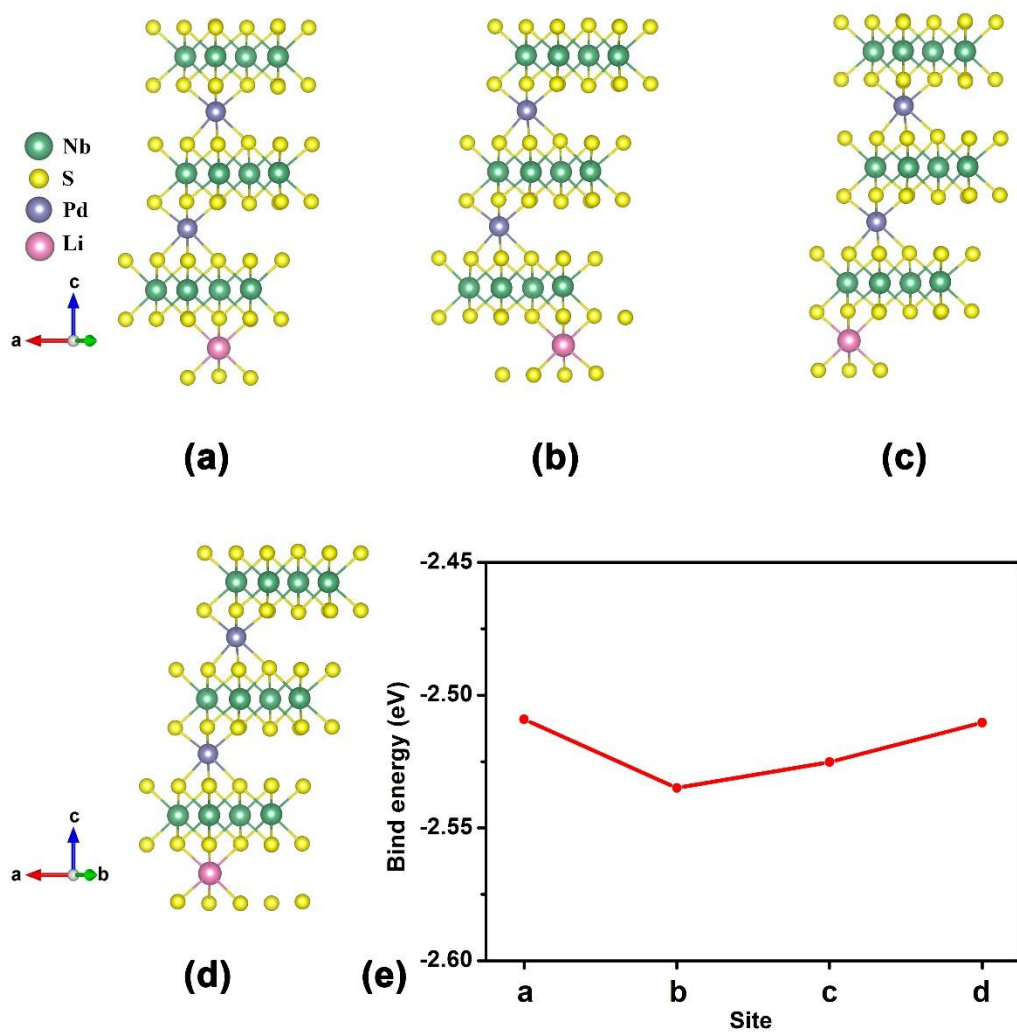

**Fig. S14** Schematic diagrams of the Li embedding site in  $\text{Pd}_{0.167}\text{NbS}_2$  ((a)-(d)). (e)

And the corresponding binding energies as a function Li embedding site.

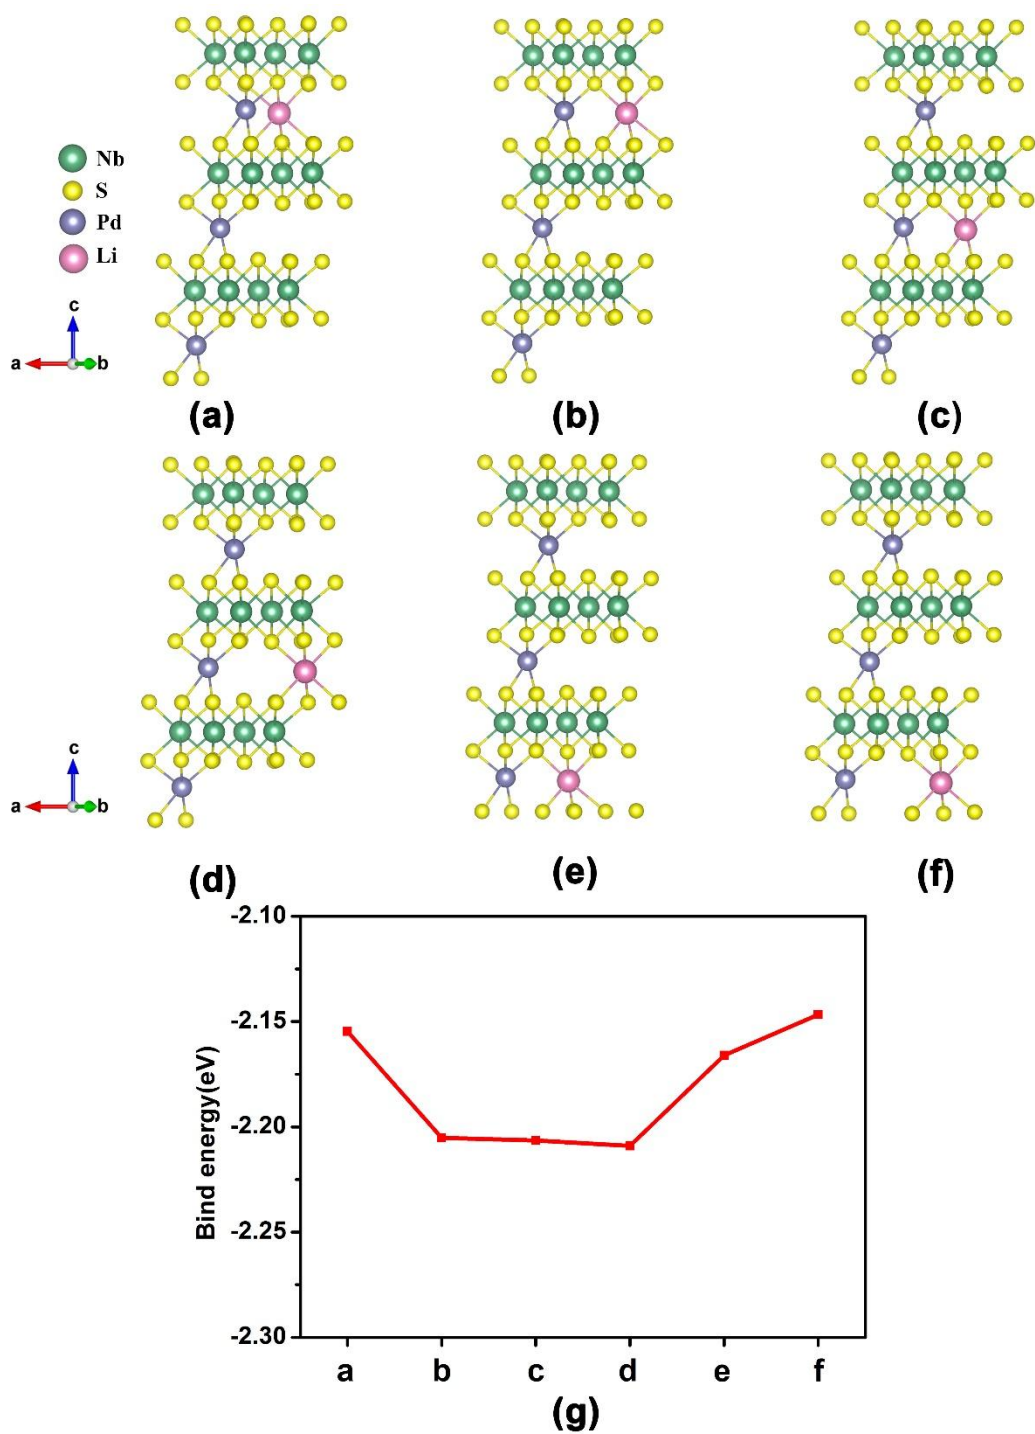

**Fig. S15** Schematic diagrams of the Li embedding site of  $\text{Pd}_{0.25}\text{NbS}_2$  ((a)-(f)). (g) And the corresponding binding energies as a function Li embedding site.

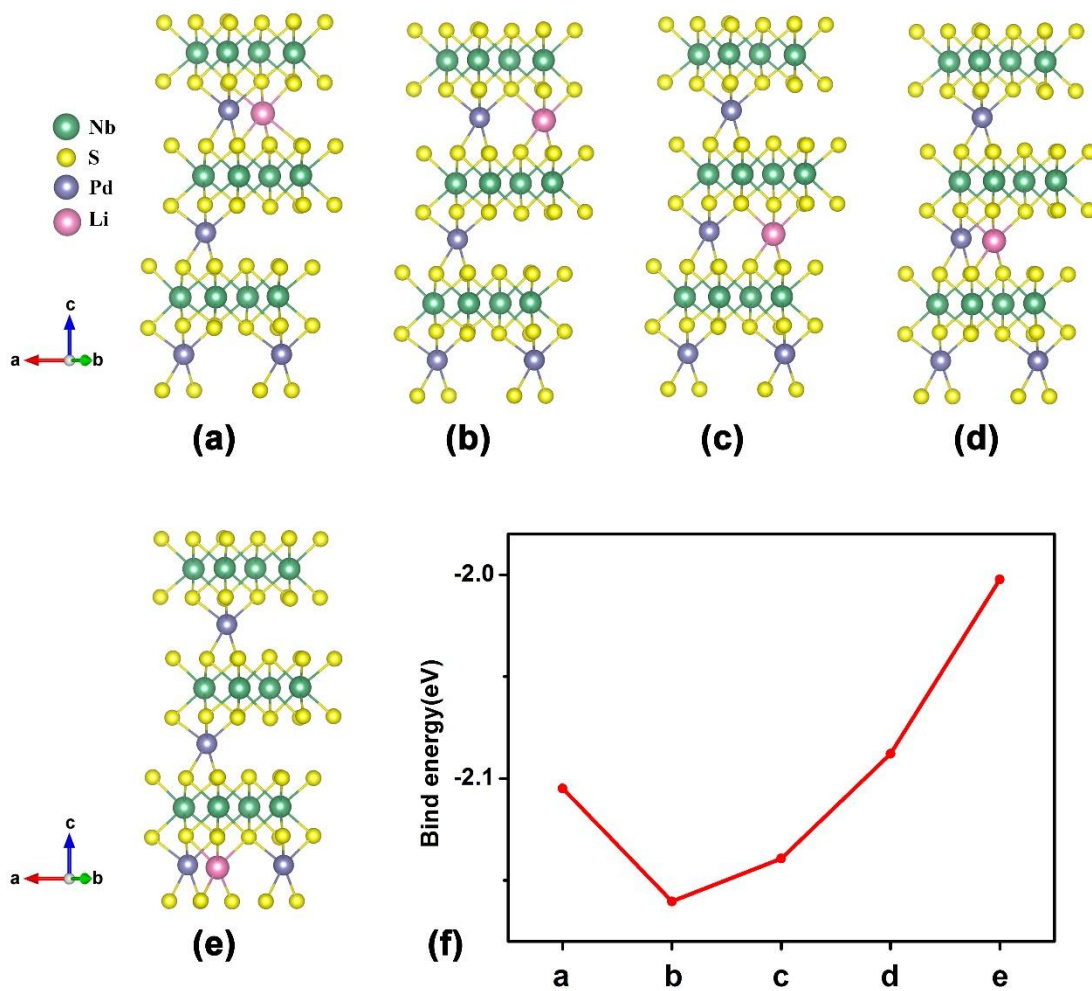

**Fig. S16** Schematic diagrams of the Li embedding site of  $\text{Pd}_{0.333}\text{NbS}_2$  ((a)-(e)). (f)

And the corresponding binding energies as a function Li embedding site.

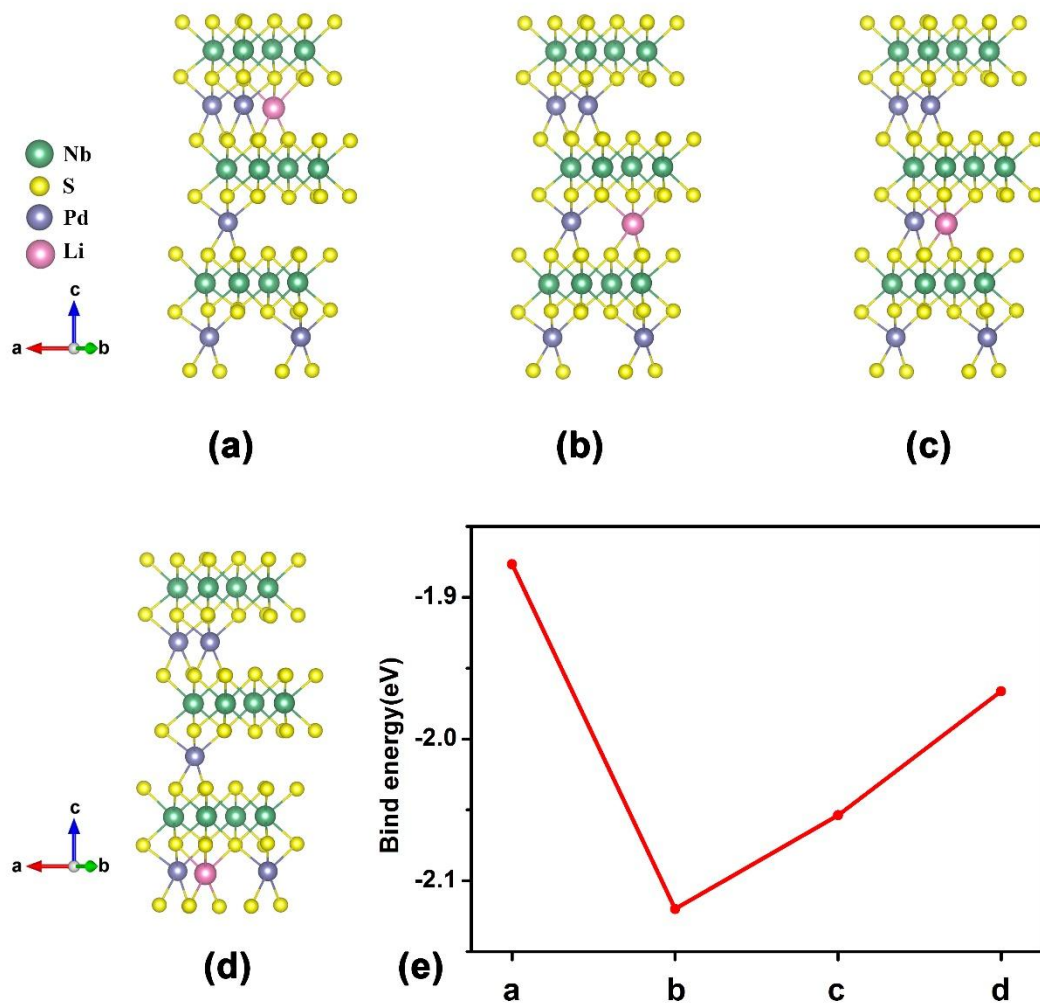

**Fig. S17** Schematic diagrams of the Li embedding site of  $\text{Pd}_{0.417}\text{NbS}_2$  ((a)-(d)). (e)

And the corresponding binding energies as a function Li embedding site.

5. Migration process of Li-ion in the  $\text{Pd}_x\text{NbS}_2$  ( $x = 0, 0.083, 0.167, 0.250, 0.333, 0.417$ )

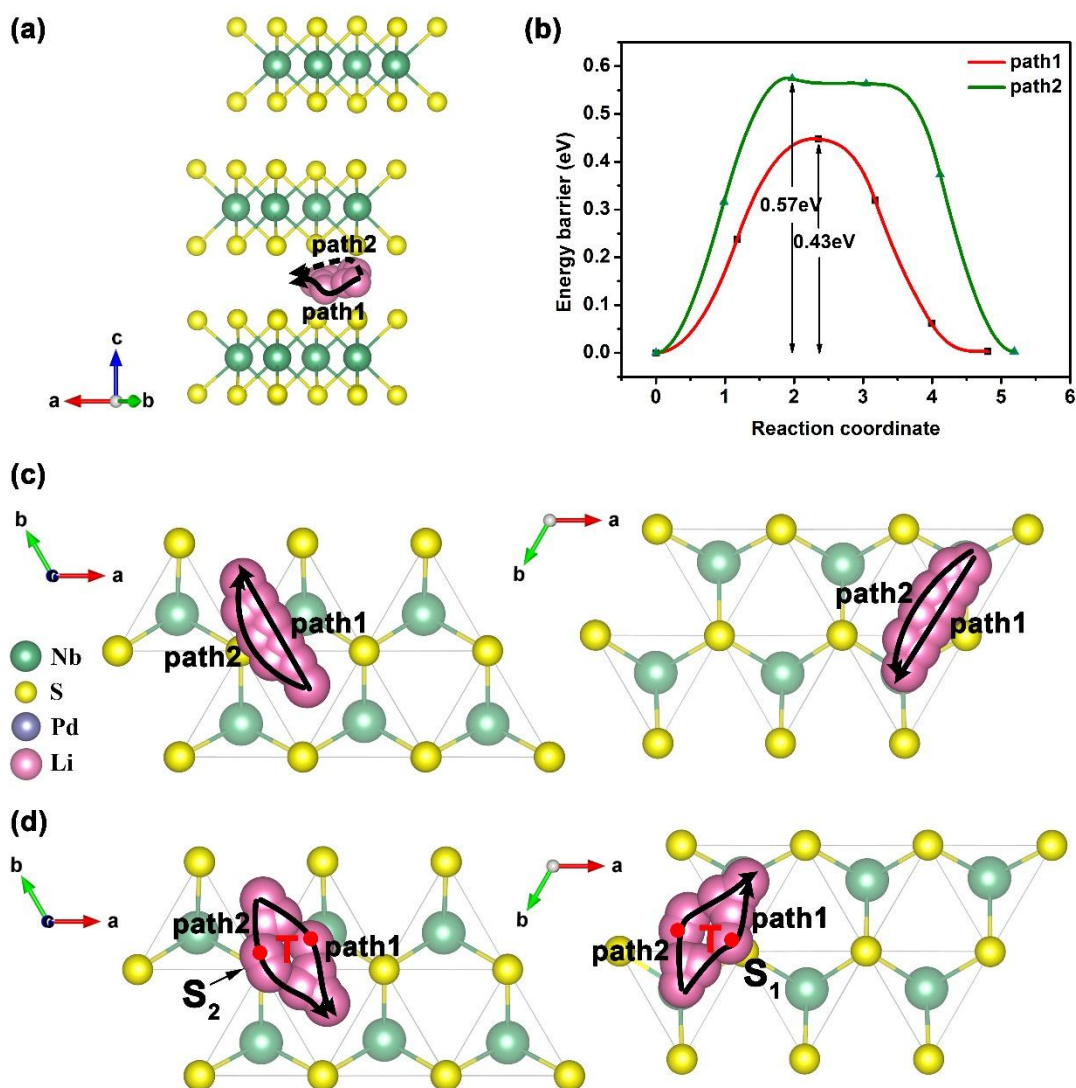

**Fig. S18** (a) Two Li-ion diffusion paths and (b) their corresponding diffusion barriers in the  $\text{NbS}_2$ ; Top view of the Li-ion diffusion paths of (c) unrelaxed structure and (d) relaxed structure in the  $\text{NbS}_2$ .

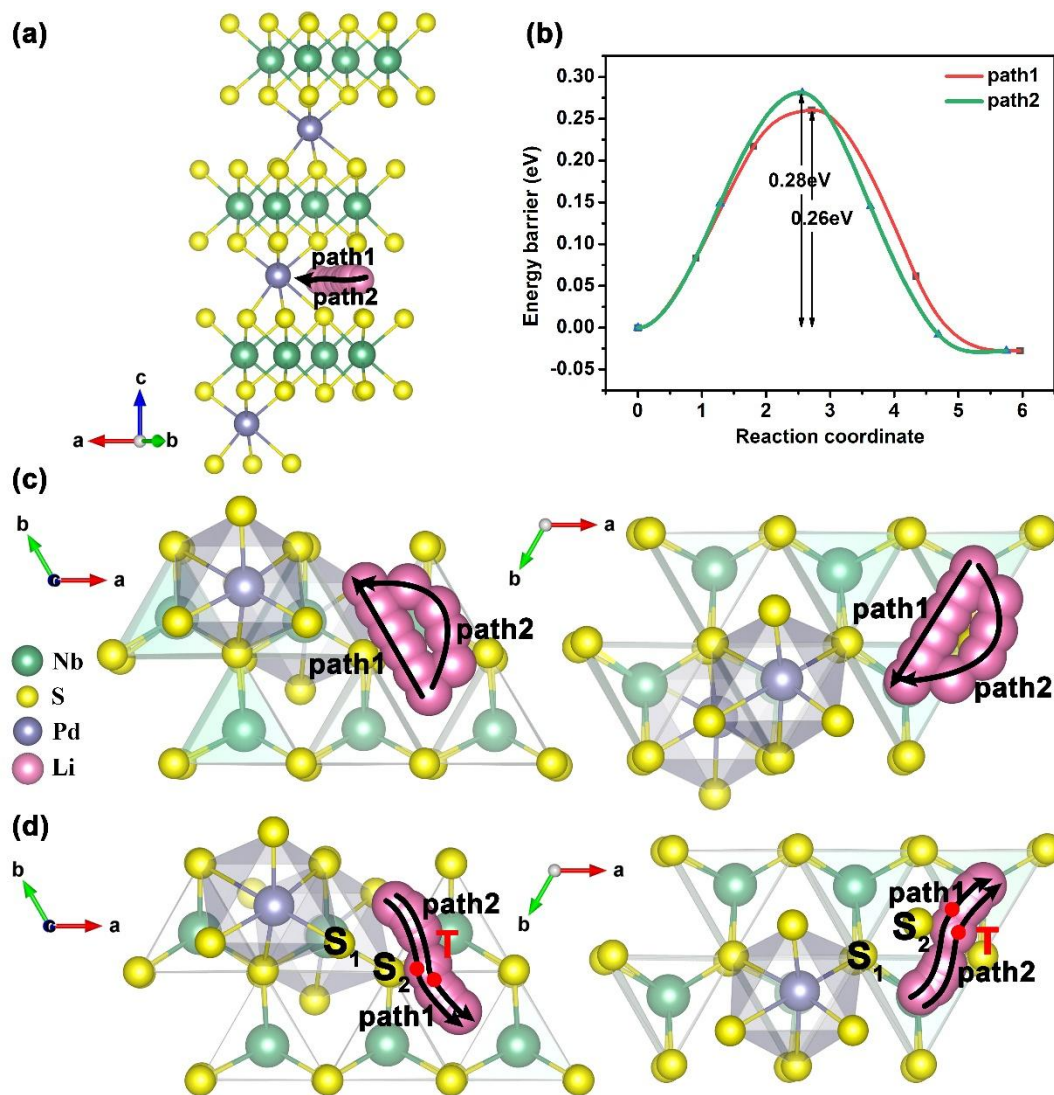

**Fig. S19** (a) Two Li-ion diffusion paths and (b) their corresponding diffusion barriers in the  $\text{Pd}_{0.25}\text{NbS}_2$ ; Top view of the Li-ion diffusion paths of (c) unrelaxed structure and (d) relaxed structure in the  $\text{NbS}_2$ .

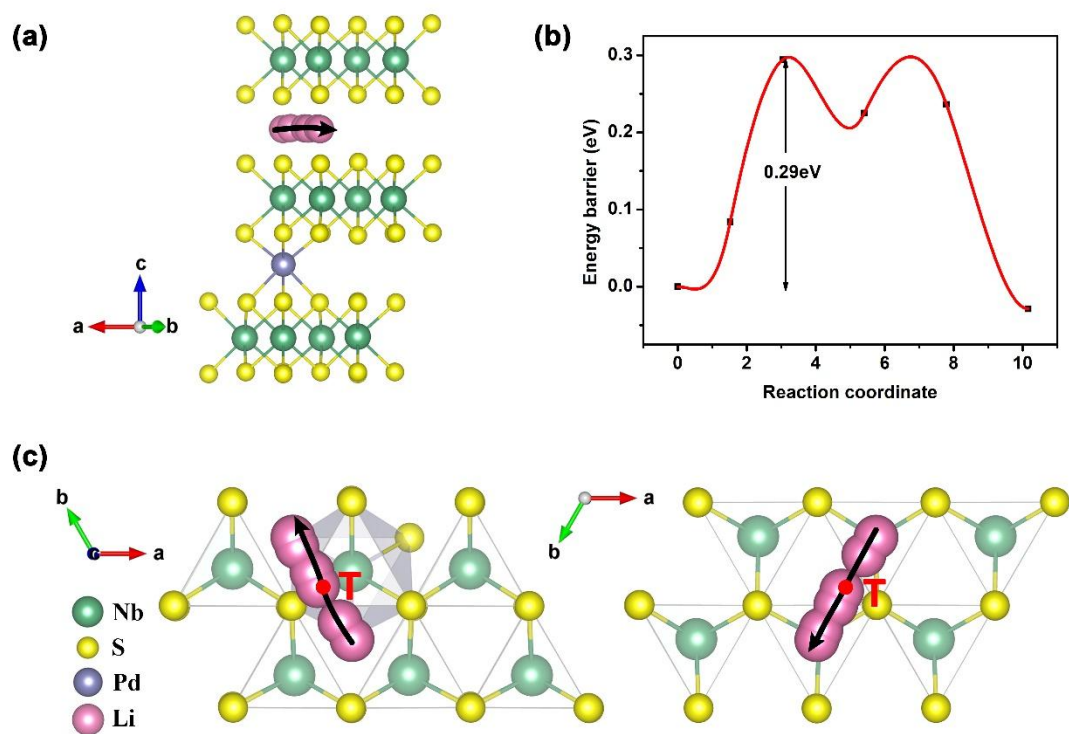

**Fig. S20** (a) The favorable Li-ion diffusion path and (b) the corresponding diffusion barrier in the  $\text{Pd}_{0.083}\text{NbS}_2$ ; (c) Top view of the favorable Li-ion diffusion paths in the  $\text{Pd}_{0.083}\text{NbS}_2$ .

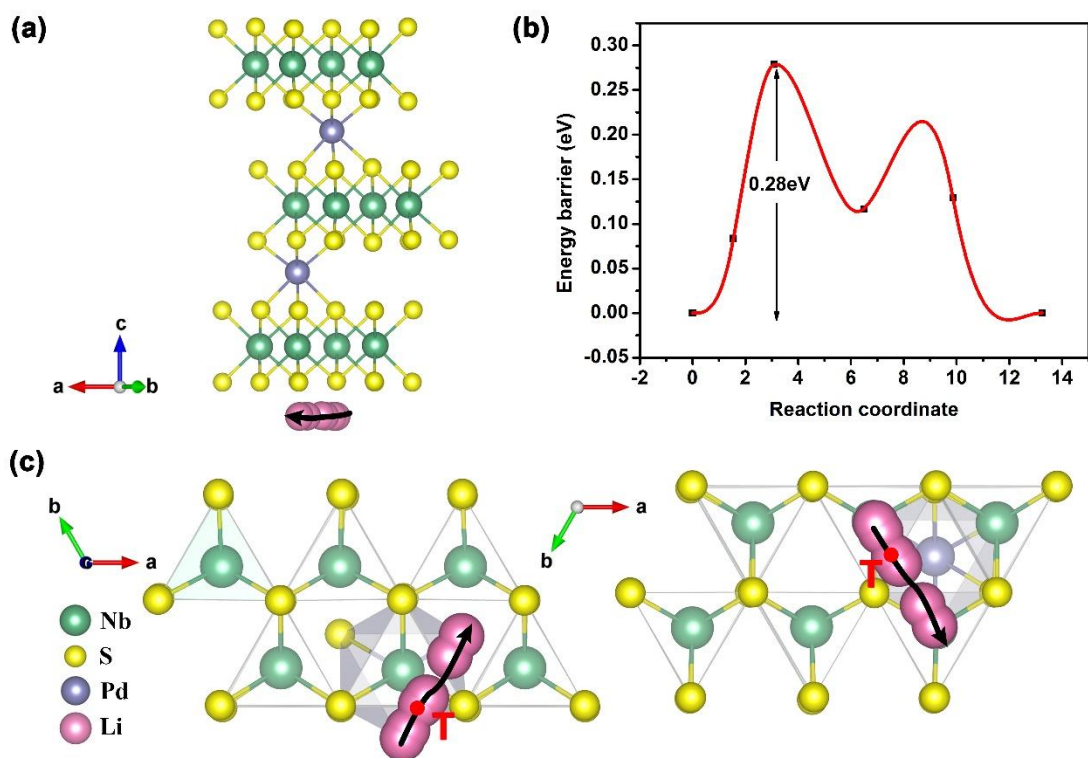

**Fig. S21** (a) The favorable Li-ion diffusion path and (b) the corresponding diffusion barrier in the  $\text{Pd}_{0.167}\text{NbS}_2$ ; (c) Top view of the favorable diffusion paths in the  $\text{Pd}_{0.167}\text{NbS}_2$ .



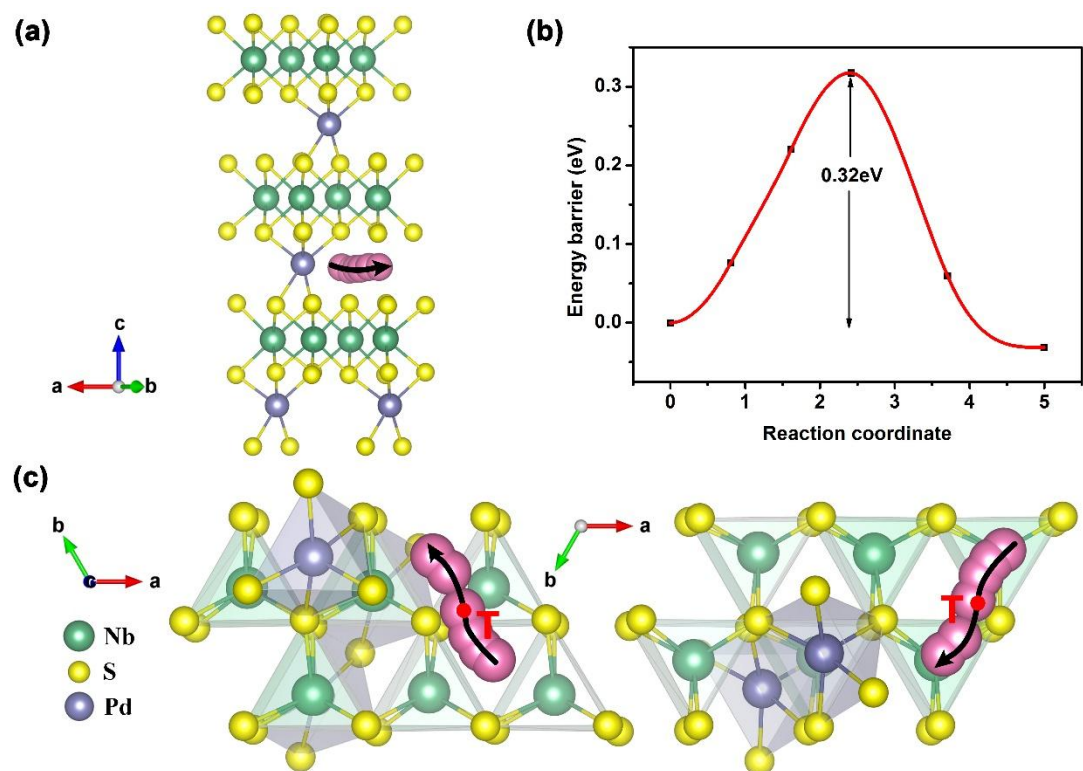

**Fig. S22** (a) The favorable Li-ion diffusion path and (b) the corresponding diffusion barrier in the  $\text{Pd}_{0.333}\text{NbS}_2$ ; (c) Top view of the favorable diffusion paths in the  $\text{Pd}_{0.333}\text{NbS}_2$ .

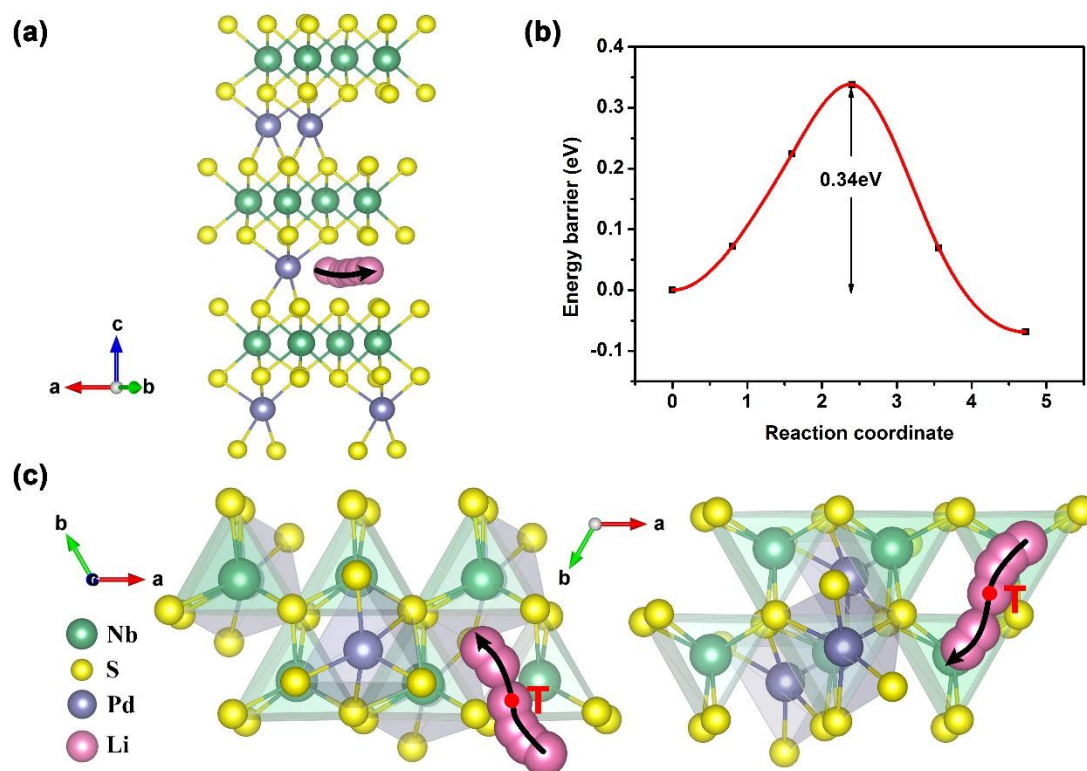

**Fig. S23** (a) The favorable Li-ion diffusion path and (b) the corresponding diffusion barrier in the  $\text{Pd}_{0.417}\text{NbS}_2$ ; (c) Top view of the favorable diffusion paths in the  $\text{Pd}_{0.417}\text{NbS}_2$ .

Next, we further analyzed the bonding behavior and PDOS of S1-Li-S2 structure in the transition states of  $\text{Pd}_{0.25}\text{NbS}_2$  and  $\text{NbS}_2$ . It can be seen from the DOS of Fig. S24(a) and (d) that Li-S orbit and S1&S2-3p orbit have different degrees of hybridization between -4 eV and 4 eV. Therefore, it can be determined that the bond distance of Li-S interacts with each other stays in the range of 2.19 Å ~ 2.66 Å. Then it is determined that the coordination number of Li-S in initial state of  $\text{Pd}_{0.25}\text{NbS}_2$  and  $\text{NbS}_2$  is 6, while Li-S coordination numbers of transition state  $\text{Pd}_{0.25}\text{NbS}_2$  and  $\text{NbS}_2$  are 5 and 4, respectively. This will lead to a small energy difference between the initial and transition state structures of Li ions in the diffusion process and then form a

low diffusion energy barrier. Fig. S24(c) and (f) show that charge transfer between Li-ion and, S1 and S2 atoms in the range of 0.09~0.25 eV/Å<sup>2</sup>, indicating that there is charge transfer between Li and S.

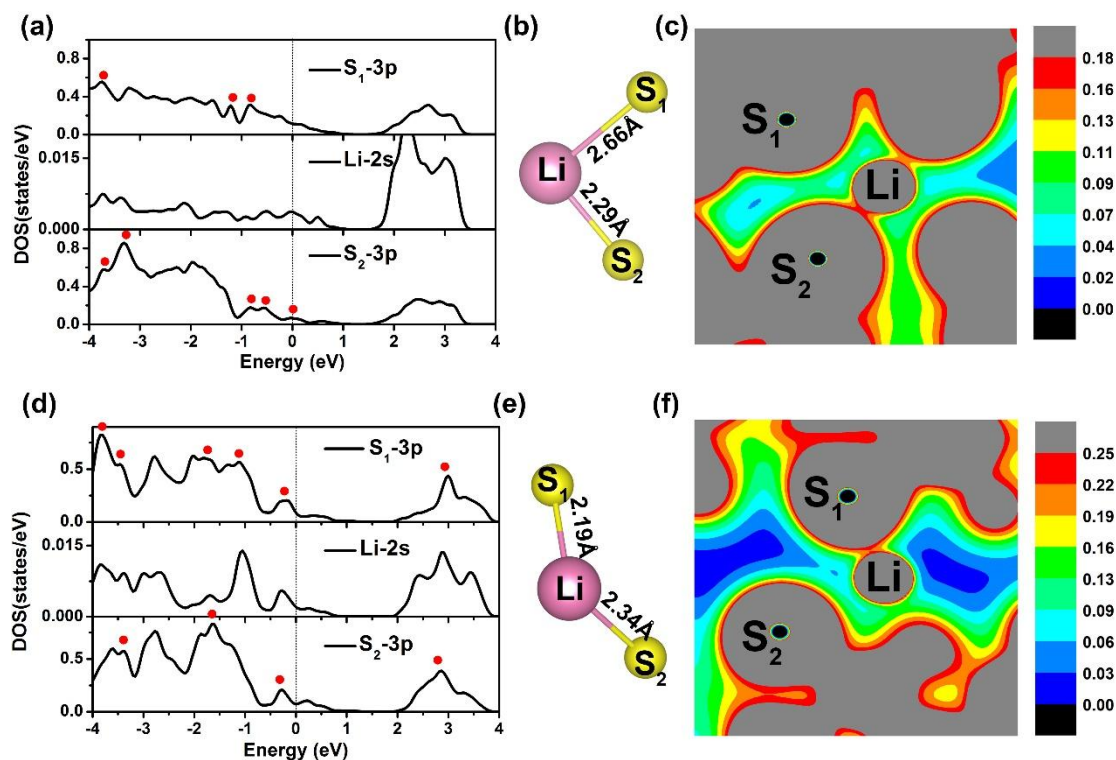

**Fig. S24** The partial density of S1-Li-S2 structure in the transition states of (a) Pd<sub>0.25</sub>NbS<sub>2</sub> and (d) NbS<sub>2</sub>; Total electron charge densities of S1-Li-S2 structure in the transition states of (c) Pd<sub>0.25</sub>NbS<sub>2</sub> and (f) NbS<sub>2</sub>. The S1-Li-S2 structures of (c) Pd<sub>0.25</sub>NbS<sub>2</sub> and (e) NbS<sub>2</sub> of the transition state.

## 6. Electrochemical performance of Li-ion in the Pd<sub>x</sub>NbS<sub>2</sub>

The insertion/deinsertion behavior of Li-ions in Pd<sub>x</sub>NbS<sub>2</sub> ( $x = 0, 0.25$ ) follows the voltage chemical reaction equation:

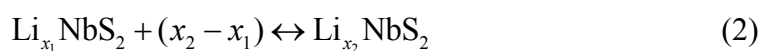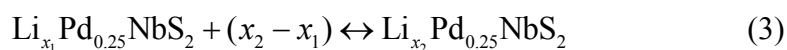

The theoretical voltages can be obtained by the following equation:<sup>49</sup>

$$V_{\text{ave}} = -\frac{E_{\text{Li}_{x_1}\text{NbS}_2} - (E_{\text{Li}_{x_2}\text{NbS}_2} + (x_2 - x_1)E_{\text{Li}})}{(x_2 - x_1)e} \quad (4)$$

Where  $E_{\text{Li}_{x_1}\text{NbS}_2}$  ( $E_{\text{Li}_{x_2}\text{NbS}_2}$ ) and  $E_{\text{Li}}$  are the total energy of  $\text{Li}_x\text{NbS}_2$  per unit formula and the bulk energy of lithium per atom, respectively.  $x_1$  ( $x_2$ ) is the number of lithium atoms. Similarly, the theoretical voltage of  $\text{Pd}_{0.25}\text{NbS}_2$  can be obtained based on the equation above.

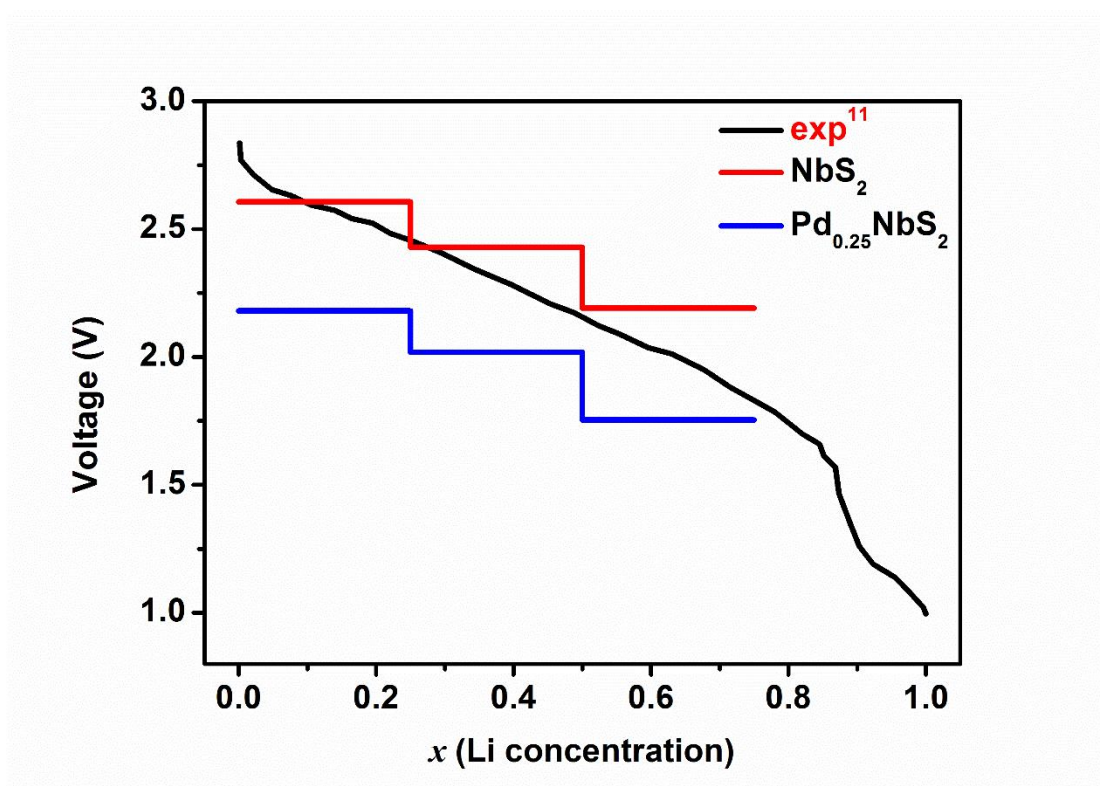

Fig. S25 The theoretical voltage for Li content as a function of specific capacity.

**Table S1** The calculated lattice constants of NbS<sub>2</sub> by different vdW correction methods

|                         | <b>EXP</b> | <b>DFT-D2</b> | <b>DFT-D3</b> | <b>optB86b-vdW</b> |
|-------------------------|------------|---------------|---------------|--------------------|
| <b>a (Å)</b>            | 3.330      | 3.341         | 3.323         | 3.327              |
| <b>c (Å)</b>            | 17.918     | 18.237        | 17.856        | 17.949             |
| <b>V(Å<sup>3</sup>)</b> | 172.100    | 176.252       | 170.768       | 172.286            |

**Table S2** The calculated lattice constants of Pd<sub>0.25</sub>NbS<sub>2</sub> by different vdW correction methods

|                         | <b>DFT-D2</b> | <b>DFT-D3</b> | <b>optB86b-vdW</b> |
|-------------------------|---------------|---------------|--------------------|
| <b>a (Å)</b>            | 3.350         | 3.341         | 3.347              |
| <b>c (Å)</b>            | 18.596        | 18.730        | 18.768             |
| <b>V(Å<sup>3</sup>)</b> | 180.119       | 179.508       | 180.897            |

**Table S3** Lattice constants of Pd<sub>x</sub>NbS<sub>2</sub> ( $x = 0, 0.083, 0.167, 0.250, 0.333, 0.417$ )

|                                      | a(Å)  | b(Å)  | c(Å)   | $\alpha$ | $\beta$ | $\gamma$ | V(Å <sup>3</sup> ) |
|--------------------------------------|-------|-------|--------|----------|---------|----------|--------------------|
| NbS <sub>2</sub>                     | 6.654 | 6.654 | 17.949 | 90.000°  | 90.000° | 120.000° | 688.174            |
| Pd <sub>0.083</sub> NbS <sub>2</sub> | 6.648 | 6.648 | 18.293 | 90.002°  | 89.998° | 120.000° | 700.157            |
| Pd <sub>0.167</sub> NbS <sub>2</sub> | 6.667 | 6.667 | 18.494 | 90.720°  | 89.280° | 120.101° | 711.204            |
| Pd <sub>0.250</sub> NbS <sub>2</sub> | 6.694 | 6.694 | 18.771 | 92.963°  | 87.037° | 120.447° | 723.848            |
| Pd <sub>0.333</sub> NbS <sub>2</sub> | 6.718 | 6.718 | 19.025 | 94.932°  | 85.069° | 120.710° | 734.579            |
| Pd <sub>0.417</sub> NbS <sub>2</sub> | 6.737 | 6.729 | 19.260 | 96.084°  | 83.891° | 120.898° | 743.642            |

**Table S4** The elastic constants of Pd<sub>x</sub>NbS<sub>2</sub> ( $x = 0, 0.083, 0.167, 0.250, 0.333, 0.417$ )

| Elastic constants                    | C11     | C12     | C13    | C14    | C33     | C44    | C66    |
|--------------------------------------|---------|---------|--------|--------|---------|--------|--------|
| NbS <sub>2</sub>                     | 136.423 | 107.417 | 12.777 | 38.735 | 59.792  | 12.151 | 14.503 |
| Pd <sub>0.083</sub> NbS <sub>2</sub> | 140.277 | 109.393 | 15.334 | 39.080 | 66.584  | 8.346  | 15.442 |
| Pd <sub>0.167</sub> NbS <sub>2</sub> | 141.032 | 109.669 | 20.233 | 39.997 | 77.468  | 7.836  | 15.682 |
| Pd <sub>0.250</sub> NbS <sub>2</sub> | 138.325 | 107.925 | 36.320 | 39.673 | 100.262 | 13.014 | 15.200 |
| Pd <sub>0.333</sub> NbS <sub>2</sub> | 142.555 | 110.455 | 42.035 | 39.873 | 110.000 | 18.974 | 16.050 |
| Pd <sub>0.417</sub> NbS <sub>2</sub> | 143.458 | 111.052 | 48.435 | 39.853 | 128.402 | 23.469 | 16.203 |

**Table S5** The bulk modulus( $B$ ), shear modulus( $G$ ), Young's modulus( $E$ ), Poisson's ratio( $\nu$ ) and  $B/G$  of  $\text{Pd}_x\text{NbS}_2$  ( $x = 0, 0.083, 0.167, 0.250, 0.333, 0.417$ ).

| Samples                         | $B(\text{GPa})$     | $G(\text{GPa})$ | $E(\text{GPa})$     | Poisson's ratio ( $\nu$ ) | $B/G$ |
|---------------------------------|---------------------|-----------------|---------------------|---------------------------|-------|
| EXP                             | 57.000 <sup>4</sup> |                 | 53.100 <sup>5</sup> | 0.350 <sup>6</sup>        |       |
| $\text{NbS}_2$                  | 56.073              | 18.101          | 49.026              | 0.354                     | 3.098 |
| $\text{Pd}_{0.083}\text{NbS}_2$ | 59.970              | 16.444          | 45.201              | 0.3744                    | 3.647 |
| $\text{Pd}_{0.167}\text{NbS}_2$ | 65.301              | 16.266          | 45.057              | 0.385                     | 4.015 |
| $\text{Pd}_{0.250}\text{NbS}_2$ | 77.572              | 18.796          | 52.174              | 0.388                     | 4.127 |
| $\text{Pd}_{0.333}\text{NbS}_2$ | 83.798              | 22.288          | 61.419              | 0.378                     | 3.760 |
| $\text{Pd}_{0.417}\text{NbS}_2$ | 90.240              | 24.171          | 66.568              | 0.377                     | 3.734 |

**Table S6** The corresponding crystal structure space group and formation enthalpy in the Nb-S system. The reference values in Materials Project and other research are listed.

| Phase                      | Structure | GGA    | Materials Project | Ref                 |
|----------------------------|-----------|--------|-------------------|---------------------|
| $\text{Nb}_{14}\text{S}_5$ | Pnma      | -13.99 | -13.34            | -11.59 <sup>7</sup> |
| $\text{Nb}_3\text{S}_4$    | P63/m     | -10.29 | -10.35            | -9.81 <sup>7</sup>  |
| $\text{NbS}$               | P63/mmc   | -2.53  | -2.47             | -2.14 <sup>7</sup>  |
| $\text{NbS}_3$             | P1        | -4.86  | -5.01             | -4.16 <sup>7</sup>  |
| $\text{Nb}_{21}\text{S}_8$ | I4/m      | -22.21 | -21.00            | /                   |
| $\text{NbS}_2$             | R3mh      | -4.29  | -4.25             | -3.72 <sup>7</sup>  |

**Table S7** Corresponding crystal structure space group and formation enthalpy in compounds containing Pd. The reference values in Materials Project and other research are listed.

| Phase                            | structure | GGA    | Materials Project | Ref                     |
|----------------------------------|-----------|--------|-------------------|-------------------------|
| NbPd <sub>3</sub>                | I4/mmm    | -1.81  | -1.69             | -1.74 <sup>8</sup>      |
| Pd <sub>16</sub> S <sub>7</sub>  | I43m      | -10.30 | -9.38             | -13.22 <sup>9, 10</sup> |
| Pd <sub>3</sub> S                | Ama2      | -1.52  | -1.34             | -1.12 <sup>9, 11</sup>  |
| Pd <sub>4</sub> S                | P421c     | -1.55  | -1.42             | -1.26 <sup>9, 11</sup>  |
| PdS                              | P42/m     | -1.37  | -1.24             | -1.76 <sup>9, 10</sup>  |
| PdS <sub>2</sub>                 | Pbca      | -2.13  | -1.79             | -2.70 <sup>10</sup>     |
| Nb <sub>2</sub> PdS <sub>5</sub> | C2/m      | -10.03 | -9.43             |                         |
| Nb <sub>2</sub> PdS <sub>6</sub> | C2/m      | -10.75 | -10.11            |                         |

**Table S8** Constraint conditions of the competitive phase in compounds containing Pd and its corresponding Pd relative chemical potential.

| Phase                            | Constraint conditions                                                                                             | Bounded Value                    |
|----------------------------------|-------------------------------------------------------------------------------------------------------------------|----------------------------------|
| NbPd <sub>3</sub>                | $\Delta\mu_{\text{Nb}} + 3\Delta\mu_{\text{Pd}} \leq \Delta H_f(\text{NbPd}_3)$                                   | $\Delta\mu_{\text{Pd}} = -0.033$ |
| Pd <sub>16</sub> S <sub>7</sub>  | $16\Delta\mu_{\text{Pd}} + 7\Delta\mu_{\text{S}} \leq \Delta H_f(\text{Pd}_{16}\text{S}_7)$                       | $\Delta\mu_{\text{Pd}} = -0.336$ |
| Pd <sub>3</sub> S                | $3\Delta\mu_{\text{Pd}} + \Delta\mu_{\text{S}} \leq \Delta H_f(\text{Pd}_3\text{S})$                              | $\Delta\mu_{\text{Pd}} = -0.256$ |
| Pd <sub>4</sub> S                | $4\Delta\mu_{\text{Pd}} + \Delta\mu_{\text{S}} \leq \Delta H_f(\text{Pd}_4\text{S})$                              | $\Delta\mu_{\text{Pd}} = -0.211$ |
| PdS                              | $\Delta\mu_{\text{Pd}} + \Delta\mu_{\text{S}} \leq \Delta H_f(\text{PdS})$                                        | $\Delta\mu_{\text{Pd}} = -0.668$ |
| PdS <sub>2</sub>                 | $\Delta\mu_{\text{Pd}} + 2\Delta\mu_{\text{S}} \leq \Delta H_f(\text{PdS}_2)$                                     | $\Delta\mu_{\text{Pd}} = -0.645$ |
| Nb <sub>2</sub> PdS <sub>5</sub> | $2\Delta\mu_{\text{Nb}} + \Delta\mu_{\text{Pd}} + 5\Delta\mu_{\text{S}} \leq \Delta H_f(\text{Nb}_2\text{PdS}_5)$ | $\Delta\mu_{\text{Pd}} = -3.745$ |
| Nb <sub>2</sub> PdS <sub>6</sub> | $2\Delta\mu_{\text{Nb}} + \Delta\mu_{\text{Pd}} + 6\Delta\mu_{\text{S}} \leq \Delta H_f(\text{Nb}_2\text{PdS}_6)$ | $\Delta\mu_{\text{Pd}} = -3.895$ |



## References:

1. Z. Zhu, I.-H. Chu, Z. Deng and S. P. Ong, *Chemistry of Materials*, 2015, **27**, 8318-8325.
2. Q. Peng, Z. Wang, B. Sa, B. Wu and Z. Sun, *ACS Appl Mater Interfaces*, 2016, **8**, 13449-13457.
3. M. Chi and Y.-P. Zhao, *Computational Materials Science*, 2009, **46**, 1085-1090.
4. W. Wang, W. Lei, X. Zheng, H. Li, X. Tang and X. Ming, *Chinese Physics B*, 2020, **29**.
5. P. Malchow, K. E. Johanns, D. Möncke, S. Korte-Kerzel, L. Wondraczek and K. Durst, *Journal of Non-Crystalline Solids*, 2015, **419**, 97-109.
6. Y. Zang, Y. Ma, R. Peng, H. Wang, B. Huang and Y. Dai, *Nano Research*, 2020, **14**, 834-839.
7. R. Lucrezi and C. Heil, *J Phys Condens Matter*, 2021, **33**.
8. D. A. Carr, J. Corbitt, G. R. Hart, E. Gilmartin and G. L. W. Hart, *Computational Materials Science*, 2012, **51**, 331-339.
9. R. Hu, M. C. Gao, Ö. N. Doğan, P. King and M. Widom, *Calphad*, 2010, **34**, 324-331.
10. M. Stickney, M. Chandrasekharaiah, K. Gingerich and J. Speed, *Metallurgical Transactions A*, 1991, **22**, 1937-1943.
11. W. P. Huhn, M. Widom and M. C. Gao, *Computational Materials Science*, 2014, **92**, 377-386.
